# Supplementary material for: Solar FTIR measurements of NO x vertical distributions – Part 2: Experiment-based scaling factors describing the daytime variation in stratospheric NO x
Source: Copernicus journal article supplement (doi:10.5194/acp-24-10001-2024), 2024-09-10
Supplement: Supplementary file 1 [file acp-24-10001-2024-supplement.pdf]

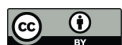

*Supplement of*

**Solar FTIR measurements of  $\text{NO}_x$  vertical distributions – Part 2:  
Experiment-based scaling factors describing the daytime variation in  
stratospheric  $\text{NO}_x$**

**Pinchas Nürnberg et al.**

*Correspondence to:* Pinchas Nürnberg (pinchasnuernberg@web.de) and Ralf Sussmann (ralf.sussmann@kit.edu)

The copyright of individual parts of the supplement might differ from the article licence.

## S1 boundary layer problem

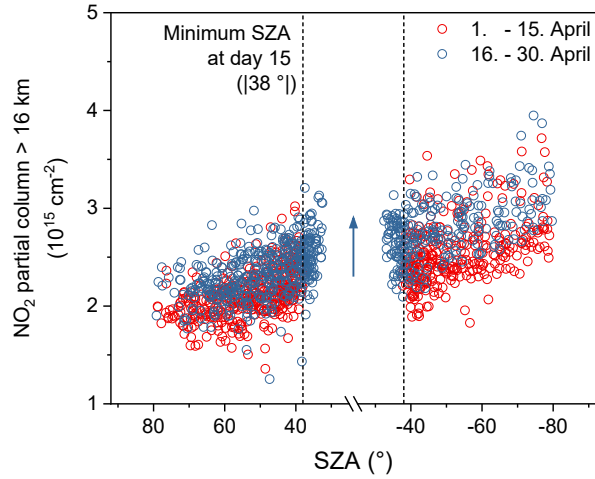

**Figure S1.** Retrieved NO<sub>2</sub> partial column above 16 km altitude measured at Zugspitze for the first half of April (red symbols) and the second half of April (blue symbols) in dependence of SZA. Additionally, the minimum SZA at day 15 is marked by a dashed line.

## 5 S2 mean scaling factors

**Table S1.** Calculated normed NO<sub>2</sub> scaling factors  $SF_{\text{exp}}(\text{NO}_2)$  above 16 km altitude measured at Zugspitze with respective solar zenith angle (SZA) and the error which represents two times the standard error of the mean ( $\pm 2 \sigma/\sqrt{n}$ ) value for January, February, and March.

| January  |                                |                     | February |                                |                     | March    |                                |                     |
|----------|--------------------------------|---------------------|----------|--------------------------------|---------------------|----------|--------------------------------|---------------------|
| SZA (°)  | $SF_{\text{exp}}(\text{NO}_2)$ | $2 \sigma/\sqrt{n}$ | SZA (°)  | $SF_{\text{exp}}(\text{NO}_2)$ | $2 \sigma/\sqrt{n}$ | SZA (°)  | $SF_{\text{exp}}(\text{NO}_2)$ | $2 \sigma/\sqrt{n}$ |
| 79.8628  | 0.8609                         | 0.10332             | 80.2933  | 0.85196                        | 0.06523             | 80.0148  | 0.81042                        | 0.15869             |
| 77.8628  | 0.8629                         | 0.0497              | 78.2933  | 0.85694                        | 0.06758             | 78.0148  | 0.87114                        | 0.07196             |
| 75.8628  | 0.91803                        | 0.04041             | 76.2933  | 0.86365                        | 0.04967             | 76.0148  | 0.85799                        | 0.08681             |
| 73.8628  | 0.92299                        | 0.04593             | 74.2933  | 0.88583                        | 0.03848             | 74.0148  | 0.85554                        | 0.05147             |
| 71.8628  | 0.93731                        | 0.03641             | 72.2933  | 0.91001                        | 0.04077             | 72.0148  | 0.84576                        | 0.0568              |
| 69.8628  | 1.00967                        | 0.02779             | 70.2933  | 0.89456                        | 0.03133             | 70.0148  | 0.89932                        | 0.04136             |
| 67.8628  | 1.0127                         | 0.0453              | 68.2933  | 0.9218                         | 0.03694             | 68.0148  | 0.84878                        | 0.0425              |
| -68.9952 | 1.09874                        | 0.03385             | 66.2933  | 0.91769                        | 0.03454             | 66.0148  | 0.88568                        | 0.03673             |
| -70.9952 | 1.13089                        | 0.03829             | 64.2933  | 0.9364                         | 0.03152             | 64.0148  | 0.85467                        | 0.03493             |
| -72.9952 | 1.17689                        | 0.05184             | 62.2933  | 0.98584                        | 0.02744             | 62.0148  | 0.91176                        | 0.03469             |
| -74.9952 | 1.18733                        | 0.05711             | 60.2933  | 0.96027                        | 0.03316             | 60.0148  | 0.87012                        | 0.02892             |
| -76.9952 | 1.23675                        | 0.07391             | -60.9975 | 1.06005                        | 0.03036             | 58.0148  | 0.90005                        | 0.03227             |
| -78.9952 | 1.29887                        | 0.06092             | -62.9975 | 1.07529                        | 0.03139             | 56.0148  | 0.91143                        | 0.02613             |
|          |                                |                     | -64.9975 | 1.09696                        | 0.04151             | 54.0148  | 0.92831                        | 0.02907             |
|          |                                |                     | -66.9975 | 1.15304                        | 0.04205             | 52.0148  | 0.97825                        | 0.026               |
|          |                                |                     | -68.9975 | 1.16225                        | 0.0427              | 50.0148  | 0.99046                        | 0.02767             |
|          |                                |                     | -70.9975 | 1.14234                        | 0.04087             | -50.9706 | 1.06745                        | 0.03342             |
|          |                                |                     | -72.9975 | 1.21832                        | 0.05073             | -52.9706 | 1.04987                        | 0.03114             |
|          |                                |                     | -74.9975 | 1.20237                        | 0.04752             | -54.9706 | 1.0661                         | 0.03364             |

|          |         |         |          |         |         |
|----------|---------|---------|----------|---------|---------|
| -76.9975 | 1.27948 | 0.0545  | -56.9706 | 1.08214 | 0.03808 |
| -78.9975 | 1.27693 | 0.06528 | -58.9706 | 1.1172  | 0.04157 |
|          |         |         | -60.9706 | 1.10248 | 0.03756 |
|          |         |         | -62.9706 | 1.11829 | 0.04507 |
|          |         |         | -64.9706 | 1.12568 | 0.04182 |
|          |         |         | -66.9706 | 1.16326 | 0.06217 |
|          |         |         | -68.9706 | 1.15608 | 0.05881 |
|          |         |         | -70.9706 | 1.19419 | 0.04381 |
|          |         |         | -72.9706 | 1.17792 | 0.06886 |
|          |         |         | -74.9706 | 1.20611 | 0.05006 |
|          |         |         | -76.9706 | 1.2466  | 0.06007 |
|          |         |         | -78.9706 | 1.24241 | 0.05735 |

10 **Table S2.** Calculated normed NO<sub>2</sub> scaling factors  $SF_{\text{exp}}(\text{NO}_2)$  above 16 km altitude measured at Zugspitze with respective solar zenith angle (SZA) and the error which represents two times the standard error of the mean ( $\pm 2 \sigma/\sqrt{n}$ ) value for April, May, and June.

| April    |                                |                     | May      |                                |                     | June     |                                |                     |
|----------|--------------------------------|---------------------|----------|--------------------------------|---------------------|----------|--------------------------------|---------------------|
| SZA (°)  | $SF_{\text{exp}}(\text{NO}_2)$ | $2 \sigma/\sqrt{n}$ | SZA (°)  | $SF_{\text{exp}}(\text{NO}_2)$ | $2 \sigma/\sqrt{n}$ | SZA (°)  | $SF_{\text{exp}}(\text{NO}_2)$ | $2 \sigma/\sqrt{n}$ |
| 77.5016  | 0.84277                        | 0.05751             | 72.7344  | 0.87344                        | 0.02653             | 70.9703  | 0.83315                        | 0.01557             |
| 75.5016  | 0.83318                        | 0.05393             | 70.7344  | 0.88085                        | 0.03964             | 68.9703  | 0.87299                        | 0.02605             |
| 73.5016  | 0.85401                        | 0.05891             | 68.7344  | 0.86837                        | 0.02092             | 66.9703  | 0.87725                        | 0.04142             |
| 71.5016  | 0.81582                        | 0.03671             | 66.7344  | 0.88184                        | 0.04545             | 64.9703  | 0.84098                        | 0.02755             |
| 69.5016  | 0.81049                        | 0.02875             | 64.7344  | 0.86588                        | 0.04005             | 62.9703  | 0.8486                         | 0.0198              |
| 67.5016  | 0.84729                        | 0.03835             | 62.7344  | 0.88458                        | 0.02836             | 60.9703  | 0.86533                        | 0.02312             |
| 65.5016  | 0.8653                         | 0.03638             | 60.7344  | 0.88287                        | 0.03599             | 58.9703  | 0.87051                        | 0.02465             |
| 63.5016  | 0.85327                        | 0.02847             | 58.7344  | 0.86687                        | 0.02838             | 56.9703  | 0.88146                        | 0.02033             |
| 61.5016  | 0.84977                        | 0.02741             | 56.7344  | 0.91376                        | 0.04102             | 54.9703  | 0.88082                        | 0.02371             |
| 59.5016  | 0.85726                        | 0.02243             | 54.7344  | 0.90022                        | 0.03079             | 52.9703  | 0.89846                        | 0.02394             |
| 57.5016  | 0.87645                        | 0.02787             | 52.7344  | 0.90825                        | 0.02175             | 50.9703  | 0.86853                        | 0.02297             |
| 55.5016  | 0.88093                        | 0.03667             | 50.7344  | 0.90799                        | 0.02742             | 48.9703  | 0.8917                         | 0.02918             |
| 53.5016  | 0.87031                        | 0.03176             | 48.7344  | 0.91735                        | 0.02802             | 46.9703  | 0.89337                        | 0.03079             |
| 51.5016  | 0.92263                        | 0.02917             | 46.7344  | 0.93795                        | 0.02644             | 44.9703  | 0.9078                         | 0.03271             |
| 49.5016  | 0.87537                        | 0.0306              | 44.7344  | 0.9119                         | 0.02803             | 42.9703  | 0.91627                        | 0.03771             |
| 47.5016  | 0.9152                         | 0.02984             | 42.7344  | 0.93014                        | 0.02787             | 40.9703  | 0.92033                        | 0.02848             |
| 45.5016  | 0.92673                        | 0.02523             | 40.7344  | 0.93654                        | 0.03069             | 38.9703  | 0.89731                        | 0.03227             |
| 43.5016  | 0.93768                        | 0.02253             | 38.7344  | 0.94295                        | 0.02304             | 36.9703  | 0.94566                        | 0.03456             |
| 41.5016  | 0.94563                        | 0.02329             | 36.7344  | 0.95456                        | 0.0359              | 34.9703  | 0.94996                        | 0.02799             |
| 39.5016  | 1.00297                        | 0.02525             | 34.7344  | 0.98178                        | 0.03185             | 32.9703  | 0.9467                         | 0.02657             |
| 37.5016  | 0.99489                        | 0.03004             | 32.7344  | 0.9564                         | 0.02902             | 30.9703  | 0.96044                        | 0.02262             |
| -38.6812 | 1.03922                        | 0.03442             | 30.7344  | 0.97765                        | 0.02345             | 28.9703  | 0.97577                        | 0.02617             |
| -40.6812 | 1.0039                         | 0.03353             | -30.3329 | 1.03519                        | 0.03216             | 26.9703  | 0.96565                        | 0.04504             |
| -42.6812 | 1.03035                        | 0.03988             | -32.3329 | 1.02788                        | 0.0298              | 24.9703  | 1.01303                        | 0.01958             |
| -44.6812 | 1.05199                        | 0.04686             | -34.3329 | 1.01254                        | 0.04961             | -24.9901 | 1.0252                         | 0.01984             |
| -46.6812 | 1.06996                        | 0.04091             | -36.3329 | 1.06711                        | 0.03026             | -26.9901 | 1.0624                         | 0.03288             |
| -48.6812 | 1.03256                        | 0.03966             | -38.3329 | 1.04212                        | 0.04656             | -28.9901 | 0.98452                        | 0.06149             |
| -50.6812 | 1.04936                        | 0.04607             | -40.3329 | 1.0725                         | 0.03561             | -30.9901 | 1.04985                        | 0.02103             |
| -52.6812 | 1.11061                        | 0.05641             | -42.3329 | 1.04911                        | 0.06663             | -32.9901 | 1.06122                        | 0.03926             |
| -54.6812 | 1.10615                        | 0.05025             | -44.3329 | 1.05143                        | 0.06185             | -34.9901 | 1.06019                        | 0.04514             |
| -56.6812 | 1.10494                        | 0.08446             | -46.3329 | 1.10587                        | 0.053               | -36.9901 | 1.07833                        | 0.05566             |
| -58.6812 | 1.11218                        | 0.0477              | -48.3329 | 1.10799                        | 0.04264             | -38.9901 | 1.07485                        | 0.11201             |
| -60.6812 | 1.09669                        | 0.06202             | -50.3329 | 1.10632                        | 0.04288             | -40.9901 | 1.06128                        | 0.07097             |
| -62.6812 | 1.15682                        | 0.108               | -52.3329 | 1.08353                        | 0.08587             | -42.9901 | 1.10667                        | 0.05838             |
| -64.6812 | 1.11912                        | 0.0543              | -54.3329 | 1.14408                        | 0.0557              | -44.9901 | 1.1617                         | 0.11299             |
| -66.6812 | 1.12382                        | 0.05203             | -56.3329 | 1.16044                        | 0.07291             | -46.9901 | 1.09641                        | 0.06687             |
| -68.6812 | 1.17333                        | 0.06753             | -58.3329 | 1.13513                        | 0.10878             | -48.9901 | 1.19961                        | 0.16496             |
| -70.6812 | 1.20216                        | 0.09159             | -60.3329 | 1.197                          | 0.06557             | -50.9901 | 1.08957                        | 0.07246             |
| -72.6812 | 1.14098                        | 0.06277             | -62.3329 | 1.20467                        | 0.07221             | -52.9901 | 1.17041                        | 0.05769             |
| -74.6812 | 1.22897                        | 0.09065             | -64.3329 | 1.18173                        | 0.08591             | -54.9901 | 1.14718                        | 0.07128             |
| -76.6812 | 1.23012                        | 0.07329             | -66.3329 | 1.15348                        | 0.11758             | -56.9901 | 1.15633                        | 0.09404             |
| -78.6812 | 1.21253                        | 0.0785              | -68.3329 | 1.20311                        | 0.05054             | -58.9901 | 1.07291                        | 0.06883             |
|          |                                |                     | -70.3329 | 1.19317                        | 0.02358             | -60.9901 | 1.15485                        | 0.03001             |
|          |                                |                     | -72.3329 | 1.23451                        | 0.11272             | -62.9901 | 1.1662                         | 0.08239             |
|          |                                |                     | -74.3329 | 1.17633                        | 0.03759             | -64.9901 | 1.16966                        | 0.06264             |
|          |                                |                     | -76.3329 | 1.32012                        | 0.02207             | -66.9901 | 1.1286                         | 0.07203             |
|          |                                |                     | -78.3329 | 1.30478                        | 0.05275             | -70.9901 | 1.18662                        | 0.05803             |
|          |                                |                     |          |                                |                     | -72.9901 | 1.20195                        | 0.06309             |
|          |                                |                     |          |                                |                     | -74.9901 | 1.22341                        | 0.05422             |
|          |                                |                     |          |                                |                     | -76.9901 | 1.25296                        | 0.03381             |
|          |                                |                     |          |                                |                     | -78.9901 | 1.23631                        | 0.10304             |

**Table S3.** Calculated normed NO<sub>2</sub> scaling factors  $SF_{\text{exp}}(\text{NO}_2)$  above 16 km altitude measured at Zugspitze with respective solar zenith angle (SZA) and the error which represents two times the standard error of the mean ( $\pm 2 \sigma/\sqrt{n}$ ) value for July, August, and September.

| July     |                                |                     | August   |                                |                     | September |                                |                     |
|----------|--------------------------------|---------------------|----------|--------------------------------|---------------------|-----------|--------------------------------|---------------------|
| SZA (°)  | $SF_{\text{exp}}(\text{NO}_2)$ | $2 \sigma/\sqrt{n}$ | SZA (°)  | $SF_{\text{exp}}(\text{NO}_2)$ | $2 \sigma/\sqrt{n}$ | SZA (°)   | $SF_{\text{exp}}(\text{NO}_2)$ | $2 \sigma/\sqrt{n}$ |
| 75.353   | 0.82834                        | 0.01848             | 74.4798  | 0.79234                        | 0.08036             | 78.2258   | 0.82362                        | 0.03968             |
| 73.353   | 0.85443                        | 0.04885             | 72.4798  | 0.84377                        | 0.05538             | 76.2258   | 0.82823                        | 0.02471             |
| 71.353   | 0.841                          | 0.01913             | 70.4798  | 0.78461                        | 0.03093             | 74.2258   | 0.81019                        | 0.02696             |
| 69.353   | 0.85032                        | 0.0206              | 68.4798  | 0.80711                        | 0.03653             | 72.2258   | 0.80877                        | 0.02086             |
| 67.353   | 0.84617                        | 0.03488             | 66.4798  | 0.80728                        | 0.03341             | 70.2258   | 0.82596                        | 0.02427             |
| 65.353   | 0.8629                         | 0.02341             | 64.4798  | 0.82433                        | 0.02322             | 68.2258   | 0.81925                        | 0.01589             |
| 63.353   | 0.84505                        | 0.01856             | 62.4798  | 0.83089                        | 0.03011             | 66.2258   | 0.83956                        | 0.01676             |
| 61.353   | 0.84434                        | 0.01638             | 60.4798  | 0.83369                        | 0.01821             | 64.2258   | 0.842                          | 0.01407             |
| 59.353   | 0.86145                        | 0.01983             | 58.4798  | 0.84791                        | 0.02427             | 62.2258   | 0.86903                        | 0.0156              |
| 57.353   | 0.87449                        | 0.01494             | 56.4798  | 0.87257                        | 0.02076             | 60.2258   | 0.87041                        | 0.0135              |
| 55.353   | 0.87253                        | 0.02514             | 54.4798  | 0.8948                         | 0.01814             | 58.2258   | 0.88666                        | 0.01902             |
| 53.353   | 0.88563                        | 0.01699             | 52.4798  | 0.88688                        | 0.01954             | 56.2258   | 0.90745                        | 0.01885             |
| 51.353   | 0.88019                        | 0.01975             | 50.4798  | 0.87899                        | 0.02492             | 54.2258   | 0.90506                        | 0.0202              |
| 49.353   | 0.88057                        | 0.02729             | 48.4798  | 0.90206                        | 0.01904             | 52.2258   | 0.92504                        | 0.02025             |
| 47.353   | 0.91584                        | 0.02059             | 46.4798  | 0.91157                        | 0.02865             | 50.2258   | 0.94497                        | 0.01545             |
| 45.353   | 0.91082                        | 0.02634             | 44.4798  | 0.93999                        | 0.02388             | 48.2258   | 0.97069                        | 0.01772             |
| 43.353   | 0.91634                        | 0.02591             | 42.4798  | 0.94949                        | 0.0197              | 46.2258   | 0.99562                        | 0.01799             |
| 41.353   | 0.94706                        | 0.01898             | 40.4798  | 0.95686                        | 0.02107             | -46.9838  | 1.06824                        | 0.02243             |
| 39.353   | 0.95194                        | 0.02238             | 38.4798  | 0.96153                        | 0.02239             | -48.9838  | 1.05325                        | 0.03313             |
| 37.353   | 0.91854                        | 0.02896             | 36.4798  | 0.98701                        | 0.01817             | -50.9838  | 1.02683                        | 0.02946             |
| 35.353   | 0.96988                        | 0.02307             | -35.6087 | 1.0365                         | 0.03443             | -52.9838  | 1.06325                        | 0.03093             |
| 33.353   | 0.95902                        | 0.01891             | -37.6087 | 1.02947                        | 0.0254              | -54.9838  | 1.09088                        | 0.041               |
| 31.353   | 0.96155                        | 0.02388             | -39.6087 | 1.03533                        | 0.02689             | -56.9838  | 1.10666                        | 0.03061             |
| 29.353   | 0.99983                        | 0.0198              | -41.6087 | 0.99891                        | 0.03708             | -58.9838  | 1.11589                        | 0.03662             |
| 27.353   | 1.01225                        | 0.01923             | -43.6087 | 1.02298                        | 0.03332             | -60.9838  | 1.12821                        | 0.04465             |
| -30.7082 | 1.04162                        | 0.03189             | -45.6087 | 1.06616                        | 0.04438             | -62.9838  | 1.11752                        | 0.0599              |
| -32.7082 | 1.01328                        | 0.06614             | -47.6087 | 1.1029                         | 0.04702             | -64.9838  | 1.15775                        | 0.03787             |
| -34.7082 | 1.11099                        | 0.04638             | -49.6087 | 1.09821                        | 0.04022             | -66.9838  | 1.14845                        | 0.04542             |
| -36.7082 | 1.04837                        | 0.08175             | -51.6087 | 1.06292                        | 0.07514             | -68.9838  | 1.13741                        | 0.04343             |
| -38.7082 | 1.05629                        | 0.0357              | -53.6087 | 1.10271                        | 0.06252             | -70.9838  | 1.15064                        | 0.05126             |
| -40.7082 | 1.07339                        | 0.0368              | -55.6087 | 1.07198                        | 0.03101             | -72.9838  | 1.20576                        | 0.03371             |
| -42.7082 | 1.0818                         | 0.06106             | -57.6087 | 1.02472                        | 0.05598             | -74.9838  | 1.17139                        | 0.03386             |
| -44.7082 | 1.09226                        | 0.05594             | -59.6087 | 1.14793                        | 0.03245             | -76.9838  | 1.20672                        | 0.04768             |
| -46.7082 | 1.09736                        | 0.09328             | -61.6087 | 1.05714                        | 0.10877             | -78.9838  | 1.2373                         | 0.03983             |
| -48.7082 | 1.0582                         | 0.04651             | -63.6087 | 1.13389                        | 0.06445             |           |                                |                     |
| -50.7082 | 1.10717                        | 0.03697             | -65.6087 | 1.15648                        | 0.04294             |           |                                |                     |
| -52.7082 | 1.13552                        | 0.09197             | -67.6087 | 1.11284                        | 0.06006             |           |                                |                     |
| -54.7082 | 1.09354                        | 0.05034             | -69.6087 | 1.13797                        | 0.02992             |           |                                |                     |
| -58.7082 | 1.12344                        | 0.05795             | -73.6087 | 1.16097                        | 0.04372             |           |                                |                     |
| -60.7082 | 1.08571                        | 0.04032             | -75.6087 | 1.15808                        | 0.02633             |           |                                |                     |
| -62.7082 | 1.1129                         | 0.09786             | -77.6087 | 1.18357                        | 0.01469             |           |                                |                     |
| -64.7082 | 1.03585                        | 0.19198             |          |                                |                     |           |                                |                     |
| -66.7082 | 1.07196                        | 0.22352             |          |                                |                     |           |                                |                     |
| -68.7082 | 1.19209                        | 0.05456             |          |                                |                     |           |                                |                     |
| -72.7082 | 1.17135                        | 0.04875             |          |                                |                     |           |                                |                     |
| -74.7082 | 1.16443                        | 0.05968             |          |                                |                     |           |                                |                     |
| -76.7082 | 1.22361                        | 0.0238              |          |                                |                     |           |                                |                     |
| -78.7082 | 1.20802                        | 0.0584              |          |                                |                     |           |                                |                     |

**Table S4.** Calculated normed NO<sub>2</sub> scaling factors  $SF_{\text{exp}}(\text{NO}_2)$  above 16 km altitude measured at Zugspitze with respective solar zenith angle (SZA) and the error which represents two times the standard error of the mean ( $\pm 2 \sigma/\sqrt{n}$ ) value for October, November, and December.

| October  |                                |                     | November |                                |                     | December |                                |                     |
|----------|--------------------------------|---------------------|----------|--------------------------------|---------------------|----------|--------------------------------|---------------------|
| SZA (°)  | $SF_{\text{exp}}(\text{NO}_2)$ | $2 \sigma/\sqrt{n}$ | SZA (°)  | $SF_{\text{exp}}(\text{NO}_2)$ | $2 \sigma/\sqrt{n}$ | SZA (°)  | $SF_{\text{exp}}(\text{NO}_2)$ | $2 \sigma/\sqrt{n}$ |
| 77.8311  | 0.85948                        | 0.01789             | 80.8135  | 0.91187                        | 0.01259             | 80.2144  | 0.95054                        | 0.1185              |
| 75.8311  | 0.86549                        | 0.0242              | 78.8135  | 0.90845                        | 0.04073             | 78.2144  | 0.9099                         | 0.0478              |
| 73.8311  | 0.8711                         | 0.0206              | 76.8135  | 0.90704                        | 0.0335              | 76.2144  | 0.9514                         | 0.04449             |
| 71.8311  | 0.87421                        | 0.01761             | 74.8135  | 0.91886                        | 0.03083             | 74.2144  | 0.96605                        | 0.03633             |
| 69.8311  | 0.88063                        | 0.01642             | 72.8135  | 0.91657                        | 0.02751             | 72.2144  | 1.0059                         | 0.03048             |
| 67.8311  | 0.88486                        | 0.02519             | 70.8135  | 0.93032                        | 0.02379             | -72.9706 | 1.13988                        | 0.03437             |
| 65.8311  | 0.89335                        | 0.0187              | 68.8135  | 0.96987                        | 0.0184              | -74.9706 | 1.16504                        | 0.04175             |
| 63.8311  | 0.90878                        | 0.01737             | -68.9998 | 1.06791                        | 0.02535             | -76.9706 | 1.22972                        | 0.04518             |
| 61.8311  | 0.91498                        | 0.01689             | -70.9998 | 1.13591                        | 0.03244             | -78.9706 | 1.24095                        | 0.05079             |
| 59.8311  | 0.95187                        | 0.01331             | -72.9998 | 1.11506                        | 0.03416             |          |                                |                     |
| 57.8311  | 0.99892                        | 0.01577             | -74.9998 | 1.16664                        | 0.04066             |          |                                |                     |
| -58.9918 | 1.06722                        | 0.02231             | -76.9998 | 1.19842                        | 0.03961             |          |                                |                     |
| -60.9918 | 1.02973                        | 0.02267             | -78.9998 | 1.22292                        | 0.04717             |          |                                |                     |
| -62.9918 | 1.06165                        | 0.02896             |          |                                |                     |          |                                |                     |
| -64.9918 | 1.08991                        | 0.03208             |          |                                |                     |          |                                |                     |
| -66.9918 | 1.09458                        | 0.02878             |          |                                |                     |          |                                |                     |
| -68.9918 | 1.1168                         | 0.03293             |          |                                |                     |          |                                |                     |
| -70.9918 | 1.14102                        | 0.03087             |          |                                |                     |          |                                |                     |
| -72.9918 | 1.15353                        | 0.03128             |          |                                |                     |          |                                |                     |
| -74.9918 | 1.18321                        | 0.03506             |          |                                |                     |          |                                |                     |
| -76.9918 | 1.16943                        | 0.03838             |          |                                |                     |          |                                |                     |
| -78.9918 | 1.21163                        | 0.04026             |          |                                |                     |          |                                |                     |

**Table S5.** Calculated normed NO scaling factors  $SF_{\text{exp}}(\text{NO})$  above 16 km altitude measured at Zugspitze with respective solar zenith angle (SZA) and the error which represents two times the standard error of the mean ( $\pm 2 \sigma/\sqrt{n}$ ) value for January, February, and March.

| January  |                              |                     | February |                              |                     | March   |                              |                     |
|----------|------------------------------|---------------------|----------|------------------------------|---------------------|---------|------------------------------|---------------------|
| SZA (°)  | $SF_{\text{exp}}(\text{NO})$ | $2 \sigma/\sqrt{n}$ | SZA (°)  | $SF_{\text{exp}}(\text{NO})$ | $2 \sigma/\sqrt{n}$ | SZA (°) | $SF_{\text{exp}}(\text{NO})$ | $2 \sigma/\sqrt{n}$ |
| 79.8474  | 0.90889                      | 0.06344             | 78.291   | 0.88664                      | 0.04743             | 80.1374 | 0.74267                      | 0.0569              |
| 77.8474  | 0.84047                      | 0.04912             | 76.291   | 0.83596                      | 0.05724             | 78.1374 | 0.7749                       | 0.04105             |
| 75.8474  | 0.87271                      | 0.04026             | 74.291   | 0.84109                      | 0.06897             | 76.1374 | 0.86701                      | 0.07491             |
| 73.8474  | 0.89184                      | 0.04741             | 72.291   | 0.86247                      | 0.05742             | 74.1374 | 0.84219                      | 0.07562             |
| 71.8474  | 0.9471                       | 0.05446             | 70.291   | 0.89744                      | 0.04598             | 72.1374 | 0.81723                      | 0.05536             |
| 69.8474  | 0.9395                       | 0.02945             | 68.291   | 0.89688                      | 0.05596             | 70.1374 | 0.79139                      | 0.05182             |
| 67.8474  | 0.98981                      | 0.04104             | 66.291   | 0.93184                      | 0.03419             | 68.1374 | 0.83046                      | 0.04842             |
| -68.8348 | 1.04624                      | 0.04201             | 64.291   | 0.92284                      | 0.03087             | 66.1374 | 0.84867                      | 0.06                |
| -70.8348 | 1.05042                      | 0.04569             | 62.291   | 0.9611                       | 0.04138             | 64.1374 | 0.88383                      | 0.0471              |
| -72.8348 | 1.04918                      | 0.04091             | 60.291   | 0.97787                      | 0.05025             | 62.1374 | 0.84654                      | 0.04362             |
| -74.8348 | 1.0246                       | 0.04794             | -60.707  | 1.01165                      | 0.05898             | 60.1374 | 0.90523                      | 0.04791             |
| -76.8348 | 1.07348                      | 0.05535             | -62.707  | 1.03043                      | 0.0324              | 58.1374 | 0.88073                      | 0.04392             |
| -78.8348 | 1.01799                      | 0.08339             | -64.707  | 0.97835                      | 0.03839             | 56.1374 | 0.90456                      | 0.04167             |
|          |                              |                     | -66.707  | 1.02286                      | 0.04894             | 54.1374 | 0.91552                      | 0.04797             |
|          |                              |                     | -68.707  | 1.0503                       | 0.06696             | 52.1374 | 0.9096                       | 0.04304             |
|          |                              |                     | -70.707  | 1.06745                      | 0.03075             | 50.1374 | 0.99792                      | 0.03793             |
|          |                              |                     | -72.707  | 1.03016                      | 0.0447              | -50.813 | 1.06577                      | 0.04035             |
|          |                              |                     | -74.707  | 1.06825                      | 0.06286             | -52.813 | 1.00764                      | 0.0552              |
|          |                              |                     | -76.707  | 1.03722                      | 0.04854             | -54.813 | 0.99326                      | 0.03869             |
|          |                              |                     | -78.707  | 0.94843                      | 0.05734             | -56.813 | 1.05332                      | 0.04217             |
|          |                              |                     |          |                              |                     | -58.813 | 0.98296                      | 0.05469             |
|          |                              |                     |          |                              |                     | -60.813 | 1.05414                      | 0.09749             |
|          |                              |                     |          |                              |                     | -62.813 | 1.07491                      | 0.05621             |
|          |                              |                     |          |                              |                     | -64.813 | 1.04774                      | 0.04223             |
|          |                              |                     |          |                              |                     | -66.813 | 0.99753                      | 0.03494             |
|          |                              |                     |          |                              |                     | -68.813 | 0.95869                      | 0.08701             |
|          |                              |                     |          |                              |                     | -70.813 | 1.04026                      | 0.04362             |
|          |                              |                     |          |                              |                     | -72.813 | 0.9924                       | 0.08024             |
|          |                              |                     |          |                              |                     | -74.813 | 1.01735                      | 0.04637             |
|          |                              |                     |          |                              |                     | -76.813 | 0.99636                      | 0.05216             |
|          |                              |                     |          |                              |                     | -78.813 | 1.05101                      | 0.09898             |

**Table S6.** Calculated normed NO scaling factors  $SF_{\text{exp}}(\text{NO})$  above 16 km altitude measured at Zugspitze with respective solar zenith angle (SZA) and the error which represents two times the standard error of the mean ( $\pm 2 \sigma/\sqrt{n}$ ) value for April, May, and June.

| April    |                              |                     | May      |                              |                     | June     |                              |                     |
|----------|------------------------------|---------------------|----------|------------------------------|---------------------|----------|------------------------------|---------------------|
| SZA (°)  | $SF_{\text{exp}}(\text{NO})$ | $2 \sigma/\sqrt{n}$ | SZA (°)  | $SF_{\text{exp}}(\text{NO})$ | $2 \sigma/\sqrt{n}$ | SZA (°)  | $SF_{\text{exp}}(\text{NO})$ | $2 \sigma/\sqrt{n}$ |
| 76.5948  | 0.76425                      | 0.01315             | 70.6782  | 0.81322                      | 0.01846             | 71.0447  | 0.76415                      | 0.02317             |
| 74.5948  | 0.77819                      | 0.06419             | 68.6782  | 0.81266                      | 0.0215              | 69.0447  | 0.929                        | 0.12677             |
| 72.5948  | 0.77796                      | 0.06635             | 66.6782  | 0.82495                      | 0.03306             | 67.0447  | 0.80688                      | 0.04407             |
| 70.5948  | 0.81399                      | 0.04395             | 64.6782  | 0.8212                       | 0.04712             | 65.0447  | 0.84458                      | 0.03093             |
| 68.5948  | 0.78508                      | 0.0514              | 62.6782  | 0.86996                      | 0.02729             | 63.0447  | 0.82362                      | 0.06167             |
| 66.5948  | 0.79006                      | 0.0296              | 60.6782  | 0.80377                      | 0.05518             | 61.0447  | 0.82289                      | 0.02985             |
| 64.5948  | 0.877                        | 0.07752             | 58.6782  | 0.86595                      | 0.02878             | 59.0447  | 0.84471                      | 0.03318             |
| 62.5948  | 0.83592                      | 0.02882             | 56.6782  | 0.84655                      | 0.03217             | 57.0447  | 0.85047                      | 0.02934             |
| 60.5948  | 0.86046                      | 0.04606             | 52.6782  | 0.91465                      | 0.06288             | 55.0447  | 0.82103                      | 0.05085             |
| 58.5948  | 0.87064                      | 0.03911             | 50.6782  | 0.89507                      | 0.04395             | 53.0447  | 0.85451                      | 0.03447             |
| 56.5948  | 0.84651                      | 0.03042             | 48.6782  | 0.90072                      | 0.03363             | 51.0447  | 0.89606                      | 0.03494             |
| 54.5948  | 0.91755                      | 0.04993             | 46.6782  | 0.92534                      | 0.02655             | 49.0447  | 0.86365                      | 0.03096             |
| 52.5948  | 0.87481                      | 0.04834             | 44.6782  | 0.93814                      | 0.03808             | 47.0447  | 0.90126                      | 0.03886             |
| 50.5948  | 0.85543                      | 0.03059             | 42.6782  | 0.96432                      | 0.04146             | 45.0447  | 0.91158                      | 0.03967             |
| 48.5948  | 0.922                        | 0.04741             | 40.6782  | 0.94664                      | 0.0343              | 43.0447  | 0.90698                      | 0.05612             |
| 46.5948  | 0.92676                      | 0.03225             | 38.6782  | 0.92505                      | 0.05553             | 41.0447  | 0.89896                      | 0.07416             |
| 44.5948  | 0.95991                      | 0.02687             | 36.6782  | 0.969                        | 0.04779             | 39.0447  | 0.89556                      | 0.03411             |
| 42.5948  | 0.93424                      | 0.03139             | 34.6782  | 0.957                        | 0.04711             | 37.0447  | 0.91928                      | 0.03277             |
| 40.5948  | 0.97506                      | 0.03725             | 32.6782  | 0.98015                      | 0.04628             | 35.0447  | 0.98363                      | 0.0565              |
| 38.5948  | 1.0053                       | 0.05356             | 30.6782  | 1.05914                      | 0.06183             | 33.0447  | 1.00038                      | 0.03095             |
| -38.9087 | 1.02398                      | 0.03116             | -31.2945 | 1.03566                      | 0.0451              | 31.0447  | 0.93713                      | 0.03044             |
| -40.9087 | 0.99894                      | 0.03316             | -33.2945 | 1.00077                      | 0.03015             | 29.0447  | 0.97134                      | 0.03838             |
| -42.9087 | 1.04262                      | 0.04006             | -35.2945 | 1.03811                      | 0.06994             | 27.0447  | 0.95165                      | 0.04093             |
| -44.9087 | 0.99359                      | 0.06463             | -37.2945 | 1.03819                      | 0.07894             | 25.0447  | 0.99507                      | 0.03546             |
| -46.9087 | 1.05051                      | 0.06359             | -39.2945 | 1.09061                      | 0.1332              | -27.4853 | 1.01564                      | 0.04768             |
| -48.9087 | 1.08962                      | 0.07405             | -41.2945 | 1.00553                      | 0.05132             | -29.4853 | 0.99636                      | 0.03505             |
| -50.9087 | 1.02405                      | 0.03134             | -43.2945 | 1.04228                      | 0.10971             | -31.4853 | 1.07208                      | 0.04097             |
| -52.9087 | 0.97401                      | 0.01725             | -47.2945 | 0.99753                      | 0.00572             | -33.4853 | 1.1184                       | 0.08467             |
| -54.9087 | 1.04272                      | 0.0796              | -49.2945 | 1.02116                      | 0.08414             | -35.4853 | 1.10719                      | 0.05608             |
| -56.9087 | 1.02399                      | 0.083               | -51.2945 | 1.06921                      | 0.04524             | -37.4853 | 1.04508                      | 0.07809             |
| -58.9087 | 0.97583                      | 0.03804             | -61.2945 | 0.9953                       | 0.0335              | -39.4853 | 1.03941                      | 0.18063             |
| -60.9087 | 1.00245                      | 0.06177             | -69.2945 | 1.03577                      | 0.07377             | -41.4853 | 1.0719                       | 0.03556             |
| -62.9087 | 1.14124                      | 0.04193             | -75.2945 | 1.01729                      | 0.09394             | -43.4853 | 0.93504                      | 0.06519             |
| -64.9087 | 1.02761                      | 0.06845             |          |                              |                     | -45.4853 | 1.02641                      | 0.06679             |
| -66.9087 | 1.01674                      | 0.07783             |          |                              |                     | -47.4853 | 1.12465                      | 0.00746             |
| -68.9087 | 1.05477                      | 0.11387             |          |                              |                     | -55.4853 | 0.90112                      | 0.07688             |
| -70.9087 | 1.02334                      | 0.07862             |          |                              |                     | -57.4853 | 1.07415                      | 0.04216             |
| -72.9087 | 1.00419                      | 0.10636             |          |                              |                     | -59.4853 | 1.08097                      | 0.09822             |
| -74.9087 | 0.93143                      | 0.0291              |          |                              |                     | -61.4853 | 1.06966                      | 0.06805             |
| -76.9087 | 0.99868                      | 0.13261             |          |                              |                     | -63.4853 | 0.99611                      | 0.22651             |
| -78.9087 | 0.96028                      | 0.0474              |          |                              |                     | -65.4853 | 1.02675                      | 0.08894             |
|          |                              |                     |          |                              |                     | -67.4853 | 1.12051                      | 0.02673             |
|          |                              |                     |          |                              |                     | -69.4853 | 0.94452                      | 0.08637             |
|          |                              |                     |          |                              |                     | -71.4853 | 0.98328                      | 0.08856             |
|          |                              |                     |          |                              |                     | -75.4853 | 0.94757                      | 0.1709              |



25 **Table S7.** Calculated normed NO scaling factors  $SF_{\text{exp}}(\text{NO})$  above 16 km altitude measured at Zugspitze with respective solar zenith angle (SZA) and the error which represents two times the standard error of the mean ( $\pm 2 \sigma/\sqrt{n}$ ) value for July, August, and September.

| July     |                              |                     | August   |                              |                     | September |                              |                     |
|----------|------------------------------|---------------------|----------|------------------------------|---------------------|-----------|------------------------------|---------------------|
| SZA (°)  | $SF_{\text{exp}}(\text{NO})$ | $2 \sigma/\sqrt{n}$ | SZA (°)  | $SF_{\text{exp}}(\text{NO})$ | $2 \sigma/\sqrt{n}$ | SZA (°)   | $SF_{\text{exp}}(\text{NO})$ | $2 \sigma/\sqrt{n}$ |
| 73.3811  | 0.77755                      | 0.13052             | 70.9262  | 0.85427                      | 0.04812             | 76.1915   | 0.8543                       | 0.04599             |
| 71.3811  | 0.89023                      | 0.10821             | 68.9262  | 0.80621                      | 0.02876             | 74.1915   | 0.85829                      | 0.05644             |
| 69.3811  | 0.82987                      | 0.04801             | 66.9262  | 0.86827                      | 0.03821             | 72.1915   | 0.81986                      | 0.02982             |
| 67.3811  | 0.85044                      | 0.05308             | 64.9262  | 0.88533                      | 0.06383             | 70.1915   | 0.83693                      | 0.03461             |
| 65.3811  | 0.86154                      | 0.04882             | 62.9262  | 0.86948                      | 0.05345             | 68.1915   | 0.87635                      | 0.03453             |
| 63.3811  | 0.83198                      | 0.02911             | 60.9262  | 0.90935                      | 0.0987              | 66.1915   | 0.85839                      | 0.03445             |
| 61.3811  | 0.86842                      | 0.06228             | 58.9262  | 0.89511                      | 0.03995             | 64.1915   | 0.87615                      | 0.06287             |
| 59.3811  | 0.87616                      | 0.03724             | 56.9262  | 0.88549                      | 0.0392              | 62.1915   | 0.8882                       | 0.04712             |
| 57.3811  | 0.87194                      | 0.04044             | 54.9262  | 0.93635                      | 0.02625             | 60.1915   | 0.9252                       | 0.03717             |
| 55.3811  | 0.89517                      | 0.02366             | 52.9262  | 0.92343                      | 0.04161             | 58.1915   | 0.92784                      | 0.04286             |
| 53.3811  | 0.86891                      | 0.03817             | 50.9262  | 0.88793                      | 0.03995             | 56.1915   | 0.95481                      | 0.04273             |
| 51.3811  | 0.89018                      | 0.03075             | 48.9262  | 0.94205                      | 0.05579             | 54.1915   | 0.97766                      | 0.04445             |
| 49.3811  | 0.91466                      | 0.03993             | 46.9262  | 0.98876                      | 0.06372             | 52.1915   | 1.00999                      | 0.03535             |
| 47.3811  | 0.92985                      | 0.03823             | 44.9262  | 0.98281                      | 0.06004             | 50.1915   | 0.98952                      | 0.03221             |
| 45.3811  | 0.92553                      | 0.02816             | 42.9262  | 0.96842                      | 0.03122             | 48.1915   | 1.00359                      | 0.04532             |
| 43.3811  | 0.99872                      | 0.08229             | 40.9262  | 0.98853                      | 0.03522             | 46.1915   | 1.038                        | 0.04081             |
| 41.3811  | 0.92331                      | 0.03681             | 38.9262  | 1.04147                      | 0.04183             | -46.7815  | 1.08067                      | 0.0366              |
| 39.3811  | 0.96519                      | 0.06915             | 36.9262  | 1.01329                      | 0.03008             | -48.7815  | 1.08284                      | 0.03741             |
| 37.3811  | 1.00522                      | 0.0619              | 34.9262  | 1.01199                      | 0.04108             | -50.7815  | 1.04286                      | 0.03993             |
| 35.3811  | 0.9769                       | 0.04918             | -37.7221 | 1.0463                       | 0.19587             | -52.7815  | 1.11087                      | 0.04677             |
| 33.3811  | 1.01398                      | 0.0385              | -39.7221 | 1.07482                      | 0.10677             | -54.7815  | 1.11016                      | 0.0462              |
| 31.3811  | 1.01425                      | 0.05731             | -41.7221 | 1.12316                      | 0.04162             | -56.7815  | 1.09237                      | 0.0543              |
| 29.3811  | 0.97257                      | 0.02974             | -43.7221 | 1.07971                      | 0.05974             | -58.7815  | 1.11109                      | 0.06757             |
| -28.8772 | 1.05384                      | 0.06651             | -45.7221 | 1.05909                      | 0.06802             | -60.7815  | 1.09956                      | 0.0525              |
| -30.8772 | 1.09591                      | 0.07065             | -47.7221 | 1.08238                      | 0.05102             | -62.7815  | 1.02523                      | 0.03625             |
| -32.8772 | 1.08897                      | 0.06985             | -49.7221 | 1.14618                      | 0.07076             | -64.7815  | 1.15814                      | 0.06242             |
| -36.8772 | 1.12212                      | 0.06385             | -51.7221 | 1.1541                       | 0.09148             | -66.7815  | 1.08641                      | 0.05687             |
| -38.8772 | 0.91148                      | 0.06993             | -55.7221 | 1.05207                      | 0.06778             | -68.7815  | 1.10012                      | 0.09481             |
| -40.8772 | 1.04319                      | 0.06258             | -57.7221 | 1.07315                      | 0.09238             | -70.7815  | 1.00562                      | 0.06712             |
| -42.8772 | 1.11777                      | 0.06396             | -59.7221 | 1.07104                      | 0.13185             | -72.7815  | 1.08733                      | 0.04173             |
| -44.8772 | 0.98087                      | 0.02473             | -61.7221 | 1.10632                      | 0.09899             | -74.7815  | 1.1044                       | 0.06901             |
| -48.8772 | 1.0313                       | 0.07431             | -63.7221 | 1.07298                      | 0.00805             | -76.7815  | 1.09542                      | 0.08796             |
| -50.8772 | 1.08766                      | 0.13023             | -67.7221 | 1.08779                      | 0.10252             | -78.7815  | 1.09179                      | 0.07267             |
| -56.8772 | 1.00872                      | 0.17725             | -69.7221 | 1.01884                      | 0.00087             |           |                              |                     |
| -60.8772 | 0.96188                      | 0.04519             |          |                              |                     |           |                              |                     |
| -62.8772 | 0.98426                      | 0.06983             |          |                              |                     |           |                              |                     |
| -64.8772 | 1.00466                      | 0.00744             |          |                              |                     |           |                              |                     |
| -66.8772 | 1.04738                      | 0.09398             |          |                              |                     |           |                              |                     |
| -68.8772 | 0.98948                      | 0.14009             |          |                              |                     |           |                              |                     |
| -72.8772 | 1.05546                      | 0.12036             |          |                              |                     |           |                              |                     |

30 **Table S8.** Calculated normed NO scaling factors  $SF_{\text{exp}}(\text{NO})$  above 16 km altitude measured at Zugspitze with respective solar zenith angle (SZA) and the error which represents two times the standard error of the mean ( $\pm 2 \sigma/\sqrt{n}$ ) value for October, November, and December.

| October  |                              |                     | November |                              |                     | December |                              |                     |
|----------|------------------------------|---------------------|----------|------------------------------|---------------------|----------|------------------------------|---------------------|
| SZA (°)  | $SF_{\text{exp}}(\text{NO})$ | $2 \sigma/\sqrt{n}$ | SZA (°)  | $SF_{\text{exp}}(\text{NO})$ | $2 \sigma/\sqrt{n}$ | SZA (°)  | $SF_{\text{exp}}(\text{NO})$ | $2 \sigma/\sqrt{n}$ |
| 80.0769  | 0.8787                       | 0.06814             | 79.398   | 0.87437                      | 0.05067             | 80.3428  | 0.96444                      | 0.07141             |
| 78.0769  | 0.83234                      | 0.03178             | 77.398   | 0.9116                       | 0.04617             | 78.3428  | 0.95694                      | 0.05632             |
| 76.0769  | 0.8872                       | 0.02758             | 75.398   | 0.93192                      | 0.03904             | 76.3428  | 0.94008                      | 0.06549             |
| 74.0769  | 0.87976                      | 0.04125             | 73.398   | 0.89215                      | 0.0359              | 74.3428  | 0.96567                      | 0.03396             |
| 72.0769  | 0.88301                      | 0.05262             | 71.398   | 0.95909                      | 0.04464             | 72.3428  | 0.97282                      | 0.04396             |
| 70.0769  | 0.8882                       | 0.04173             | 69.398   | 0.95888                      | 0.03096             | -72.9104 | 1.10974                      | 0.04859             |
| 68.0769  | 0.90667                      | 0.04524             | -68.9276 | 1.04963                      | 0.03372             | -74.9104 | 1.08188                      | 0.04459             |
| 66.0769  | 0.95886                      | 0.03792             | -70.9276 | 1.06593                      | 0.03884             | -76.9104 | 1.13186                      | 0.10294             |
| 64.0769  | 0.96427                      | 0.03138             | -72.9276 | 1.08005                      | 0.03428             | -78.9104 | 1.08526                      | 0.06882             |
| 62.0769  | 0.96116                      | 0.02947             | -74.9276 | 1.08601                      | 0.04365             |          |                              |                     |
| 60.0769  | 1.00615                      | 0.04027             | -76.9276 | 1.05912                      | 0.06136             |          |                              |                     |
| 58.0769  | 1.0202                       | 0.04691             | -78.9276 | 1.05216                      | 0.05427             |          |                              |                     |
| -58.7488 | 1.1135                       | 0.03532             |          |                              |                     |          |                              |                     |
| -60.7488 | 1.07427                      | 0.03409             |          |                              |                     |          |                              |                     |
| -62.7488 | 1.02723                      | 0.03038             |          |                              |                     |          |                              |                     |
| -64.7488 | 1.09113                      | 0.03743             |          |                              |                     |          |                              |                     |
| -66.7488 | 1.07506                      | 0.06742             |          |                              |                     |          |                              |                     |
| -68.7488 | 1.06264                      | 0.03464             |          |                              |                     |          |                              |                     |
| -70.7488 | 1.10263                      | 0.03691             |          |                              |                     |          |                              |                     |
| -72.7488 | 1.05618                      | 0.03819             |          |                              |                     |          |                              |                     |
| -74.7488 | 1.06954                      | 0.03705             |          |                              |                     |          |                              |                     |
| -76.7488 | 1.05673                      | 0.03798             |          |                              |                     |          |                              |                     |
| -78.7488 | 1.08839                      | 0.0577              |          |                              |                     |          |                              |                     |

### S3 binned and filtered partial columns > 16 km

**Table S9.** NO<sub>2</sub> partial column above 16 km altitude measured at Zugspitze with respective solar zenith angle (SZA) and the error which represents two times the standard error of the mean ( $\pm 2 \sigma/\sqrt{n}$ ) value for January, February, and March.

| January  |                                |                     | February |                                |                     | March   |                                |                     |
|----------|--------------------------------|---------------------|----------|--------------------------------|---------------------|---------|--------------------------------|---------------------|
| SZA (°)  | NO <sub>2</sub> partial column | $2 \sigma/\sqrt{n}$ | SZA (°)  | NO <sub>2</sub> partial column | $2 \sigma/\sqrt{n}$ | SZA (°) | NO <sub>2</sub> partial column | $2 \sigma/\sqrt{n}$ |
| 79.8628  | 1.11E+15                       | 1.34E+14            | 80.2933  | 1.32E+15                       | 1.01E+14            | 80.0148 | 1.63E+15                       | 3.20E+14            |
| 77.8628  | 1.12E+15                       | 6.42E+13            | 78.2933  | 1.33E+15                       | 1.05E+14            | 78.0148 | 1.76E+15                       | 1.45E+14            |
| 75.8628  | 1.19E+15                       | 5.22E+13            | 76.2933  | 1.34E+15                       | 7.72E+13            | 76.0148 | 1.73E+15                       | 1.75E+14            |
| 73.8628  | 1.19E+15                       | 5.94E+13            | 74.2933  | 1.38E+15                       | 5.98E+13            | 74.0148 | 1.72E+15                       | 1.04E+14            |
| 71.8628  | 1.21E+15                       | 4.71E+13            | 72.2933  | 1.42E+15                       | 6.34E+13            | 72.0148 | 1.71E+15                       | 1.15E+14            |
| 69.8628  | 1.30E+15                       | 3.59E+13            | 70.2933  | 1.39E+15                       | 4.87E+13            | 70.0148 | 1.81E+15                       | 8.34E+13            |
| -68.9952 | 1.42E+15                       | 4.37E+13            | 68.2933  | 1.43E+15                       | 5.74E+13            | 68.0148 | 1.71E+15                       | 8.57E+13            |
| -70.9952 | 1.46E+15                       | 4.95E+13            | 66.2933  | 1.43E+15                       | 5.37E+13            | 66.0148 | 1.79E+15                       | 7.40E+13            |
| -72.9952 | 1.52E+15                       | 6.70E+13            | 64.2933  | 1.46E+15                       | 4.90E+13            | 64.0148 | 1.72E+15                       | 7.04E+13            |
| -74.9952 | 1.53E+15                       | 7.38E+13            | 62.2933  | 1.53E+15                       | 4.27E+13            | 62.0148 | 1.84E+15                       | 6.99E+13            |
| -76.9952 | 1.60E+15                       | 9.55E+13            | 60.2933  | 1.49E+15                       | 5.16E+13            | 60.0148 | 1.75E+15                       | 5.83E+13            |
| -78.9952 | 1.68E+15                       | 7.87E+13            | -60.9975 | 1.65E+15                       | 4.72E+13            | 58.0148 | 1.81E+15                       | 6.51E+13            |
|          |                                |                     | -62.9975 | 1.67E+15                       | 4.88E+13            | 56.0148 | 1.84E+15                       | 5.27E+13            |
|          |                                |                     | -64.9975 | 1.71E+15                       | 6.46E+13            | 54.0148 | 1.87E+15                       | 5.86E+13            |
|          |                                |                     | -66.9975 | 1.79E+15                       | 6.54E+13            | 52.0148 | 1.97E+15                       | 5.24E+13            |

|          |          |          |          |          |          |
|----------|----------|----------|----------|----------|----------|
| -68.9975 | 1.81E+15 | 6.64E+13 | 50.0148  | 2.00E+15 | 5.58E+13 |
| -70.9975 | 1.78E+15 | 6.36E+13 | -50.9706 | 2.15E+15 | 6.74E+13 |
| -72.9975 | 1.89E+15 | 7.89E+13 | -52.9706 | 2.12E+15 | 6.28E+13 |
| -74.9975 | 1.87E+15 | 7.39E+13 | -54.9706 | 2.15E+15 | 6.78E+13 |
| -76.9975 | 1.99E+15 | 8.48E+13 | -56.9706 | 2.18E+15 | 7.68E+13 |
| -78.9975 | 1.99E+15 | 1.02E+14 | -58.9706 | 2.25E+15 | 8.38E+13 |
|          |          |          | -60.9706 | 2.22E+15 | 7.57E+13 |
|          |          |          | -62.9706 | 2.25E+15 | 9.09E+13 |
|          |          |          | -64.9706 | 2.27E+15 | 8.43E+13 |
|          |          |          | -66.9706 | 2.35E+15 | 1.25E+14 |
|          |          |          | -68.9706 | 2.33E+15 | 1.19E+14 |
|          |          |          | -70.9706 | 2.41E+15 | 8.83E+13 |
|          |          |          | -72.9706 | 2.37E+15 | 1.39E+14 |
|          |          |          | -74.9706 | 2.43E+15 | 1.01E+14 |
|          |          |          | -76.9706 | 2.51E+15 | 1.21E+14 |
|          |          |          | -78.9706 | 2.50E+15 | 1.16E+14 |

35

**Table S10.** NO<sub>2</sub> partial column above 16 km altitude measured at Zugspitze with respective solar zenith angle (SZA) and the error which represents two times the standard error of the mean ( $\pm 2 \sigma/\sqrt{(n)}$ ) value for April, May, and June.

| April    |                                |                       | May      |                                |                       | June     |                                |                       |
|----------|--------------------------------|-----------------------|----------|--------------------------------|-----------------------|----------|--------------------------------|-----------------------|
| SZA (°)  | NO <sub>2</sub> partial column | $2 \sigma/\sqrt{(n)}$ | SZA (°)  | NO <sub>2</sub> partial column | $2 \sigma/\sqrt{(n)}$ | SZA (°)  | NO <sub>2</sub> partial column | $2 \sigma/\sqrt{(n)}$ |
| 77.5016  | 2.06E+15                       | 1.41E+14              | 72.7344  | 2.52E+15                       | 7.67E+13              | 70.9703  | 2.67E+15                       | 4.98E+13              |
| 75.5016  | 2.04E+15                       | 1.32E+14              | 70.7344  | 2.55E+15                       | 1.15E+14              | 68.9703  | 2.79E+15                       | 8.33E+13              |
| 73.5016  | 2.09E+15                       | 1.44E+14              | 68.7344  | 2.51E+15                       | 6.05E+13              | 66.9703  | 2.81E+15                       | 1.32E+14              |
| 71.5016  | 2.00E+15                       | 8.98E+13              | 66.7344  | 2.55E+15                       | 1.31E+14              | 64.9703  | 2.69E+15                       | 8.81E+13              |
| 69.5016  | 1.98E+15                       | 7.03E+13              | 64.7344  | 2.50E+15                       | 1.16E+14              | 62.9703  | 2.71E+15                       | 6.34E+13              |
| 67.5016  | 2.07E+15                       | 9.38E+13              | 62.7344  | 2.56E+15                       | 8.20E+13              | 60.9703  | 2.77E+15                       | 7.40E+13              |
| 65.5016  | 2.12E+15                       | 8.90E+13              | 60.7344  | 2.55E+15                       | 1.04E+14              | 58.9703  | 2.78E+15                       | 7.89E+13              |
| 63.5016  | 2.09E+15                       | 6.97E+13              | 58.7344  | 2.51E+15                       | 8.20E+13              | 56.9703  | 2.82E+15                       | 6.50E+13              |
| 61.5016  | 2.08E+15                       | 6.70E+13              | 56.7344  | 2.64E+15                       | 1.19E+14              | 54.9703  | 2.82E+15                       | 7.59E+13              |
| 59.5016  | 2.10E+15                       | 5.49E+13              | 54.7344  | 2.60E+15                       | 8.90E+13              | 52.9703  | 2.87E+15                       | 7.66E+13              |
| 57.5016  | 2.14E+15                       | 6.82E+13              | 52.7344  | 2.63E+15                       | 6.29E+13              | 50.9703  | 2.78E+15                       | 7.35E+13              |
| 55.5016  | 2.16E+15                       | 8.97E+13              | 50.7344  | 2.62E+15                       | 7.93E+13              | 48.9703  | 2.85E+15                       | 9.33E+13              |
| 53.5016  | 2.13E+15                       | 7.77E+13              | 48.7344  | 2.65E+15                       | 8.10E+13              | 46.9703  | 2.86E+15                       | 9.85E+13              |
| 51.5016  | 2.26E+15                       | 7.14E+13              | 46.7344  | 2.71E+15                       | 7.64E+13              | 44.9703  | 2.90E+15                       | 1.05E+14              |
| 49.5016  | 2.14E+15                       | 7.49E+13              | 44.7344  | 2.64E+15                       | 8.10E+13              | 42.9703  | 2.93E+15                       | 1.21E+14              |
| 47.5016  | 2.24E+15                       | 7.30E+13              | 42.7344  | 2.69E+15                       | 8.06E+13              | 40.9703  | 2.94E+15                       | 9.11E+13              |
| 45.5016  | 2.27E+15                       | 6.17E+13              | 40.7344  | 2.71E+15                       | 8.87E+13              | 38.9703  | 2.87E+15                       | 1.03E+14              |
| 43.5016  | 2.29E+15                       | 5.51E+13              | 38.7344  | 2.73E+15                       | 6.66E+13              | 36.9703  | 3.03E+15                       | 1.11E+14              |
| 41.5016  | 2.31E+15                       | 5.70E+13              | 36.7344  | 2.76E+15                       | 1.04E+14              | 34.9703  | 3.04E+15                       | 8.95E+13              |
| 39.5016  | 2.45E+15                       | 6.18E+13              | 34.7344  | 2.84E+15                       | 9.21E+13              | 32.9703  | 3.03E+15                       | 8.50E+13              |
| -38.6812 | 2.54E+15                       | 8.42E+13              | 32.7344  | 2.76E+15                       | 8.39E+13              | 30.9703  | 3.07E+15                       | 7.24E+13              |
| -40.6812 | 2.46E+15                       | 8.20E+13              | 30.7344  | 2.83E+15                       | 6.78E+13              | 28.9703  | 3.12E+15                       | 8.37E+13              |
| -42.6812 | 2.52E+15                       | 9.76E+13              | -30.3329 | 2.99E+15                       | 9.30E+13              | 26.9703  | 3.09E+15                       | 1.44E+14              |
| -44.6812 | 2.57E+15                       | 1.15E+14              | -32.3329 | 2.97E+15                       | 8.62E+13              | 24.9703  | 3.24E+15                       | 6.26E+13              |
| -46.6812 | 2.62E+15                       | 1.00E+14              | -34.3329 | 2.93E+15                       | 1.43E+14              | -24.9901 | 3.28E+15                       | 6.35E+13              |
| -48.6812 | 2.53E+15                       | 9.70E+13              | -36.3329 | 3.08E+15                       | 8.75E+13              | -26.9901 | 3.40E+15                       | 1.05E+14              |
| -50.6812 | 2.57E+15                       | 1.13E+14              | -38.3329 | 3.01E+15                       | 1.35E+14              | -28.9901 | 3.15E+15                       | 1.97E+14              |
| -52.6812 | 2.72E+15                       | 1.38E+14              | -40.3329 | 3.10E+15                       | 1.03E+14              | -30.9901 | 3.36E+15                       | 6.73E+13              |
| -54.6812 | 2.71E+15                       | 1.23E+14              | -42.3329 | 3.03E+15                       | 1.93E+14              | -32.9901 | 3.40E+15                       | 1.26E+14              |
| -56.6812 | 2.70E+15                       | 2.07E+14              | -44.3329 | 3.04E+15                       | 1.79E+14              | -34.9901 | 3.39E+15                       | 1.44E+14              |
| -58.6812 | 2.72E+15                       | 1.17E+14              | -46.3329 | 3.20E+15                       | 1.53E+14              | -36.9901 | 3.45E+15                       | 1.78E+14              |
| -60.6812 | 2.68E+15                       | 1.52E+14              | -48.3329 | 3.20E+15                       | 1.23E+14              | -38.9901 | 3.44E+15                       | 3.58E+14              |

|          |          |          |          |          |          |          |          |          |
|----------|----------|----------|----------|----------|----------|----------|----------|----------|
| -62.6812 | 2.83E+15 | 2.64E+14 | -50.3329 | 3.20E+15 | 1.24E+14 | -40.9901 | 3.40E+15 | 2.27E+14 |
| -64.6812 | 2.74E+15 | 1.33E+14 | -52.3329 | 3.13E+15 | 2.48E+14 | -42.9901 | 3.54E+15 | 1.87E+14 |
| -66.6812 | 2.75E+15 | 1.27E+14 | -54.3329 | 3.31E+15 | 1.61E+14 | -44.9901 | 3.72E+15 | 3.61E+14 |
| -68.6812 | 2.87E+15 | 1.65E+14 | -56.3329 | 3.35E+15 | 2.11E+14 | -46.9901 | 3.51E+15 | 2.14E+14 |
| -70.6812 | 2.94E+15 | 2.24E+14 | -58.3329 | 3.28E+15 | 3.14E+14 | -48.9901 | 3.84E+15 | 5.28E+14 |
| -72.6812 | 2.79E+15 | 1.54E+14 | -60.3329 | 3.46E+15 | 1.90E+14 | -50.9901 | 3.49E+15 | 2.32E+14 |
| -74.6812 | 3.01E+15 | 2.22E+14 | -62.3329 | 3.48E+15 | 2.09E+14 | -52.9901 | 3.74E+15 | 1.85E+14 |
| -76.6812 | 3.01E+15 | 1.79E+14 | -64.3329 | 3.42E+15 | 2.48E+14 | -54.9901 | 3.67E+15 | 2.28E+14 |
| -78.6812 | 2.97E+15 | 1.92E+14 | -66.3329 | 3.33E+15 | 3.40E+14 | -56.9901 | 3.70E+15 | 3.01E+14 |
|          |          |          | -68.3329 | 3.48E+15 | 1.46E+14 | -58.9901 | 3.43E+15 | 2.20E+14 |
|          |          |          | -70.3329 | 3.45E+15 | 6.82E+13 | -60.9901 | 3.69E+15 | 9.60E+13 |
|          |          |          | -72.3329 | 3.57E+15 | 3.26E+14 | -62.9901 | 3.73E+15 | 2.64E+14 |
|          |          |          | -74.3329 | 3.40E+15 | 1.09E+14 | -64.9901 | 3.74E+15 | 2.00E+14 |
|          |          |          | -76.3329 | 3.82E+15 | 6.38E+13 | -66.9901 | 3.61E+15 | 2.30E+14 |
|          |          |          | -78.3329 | 3.77E+15 | 1.52E+14 | -70.9901 | 3.80E+15 | 1.86E+14 |
|          |          |          |          |          |          | -72.9901 | 3.85E+15 | 2.02E+14 |
|          |          |          |          |          |          | -74.9901 | 3.91E+15 | 1.73E+14 |
|          |          |          |          |          |          | -76.9901 | 4.01E+15 | 1.08E+14 |
|          |          |          |          |          |          | -78.9901 | 3.96E+15 | 3.30E+14 |

40 **Table S11.** NO<sub>2</sub> partial column above 16 km altitude measured at Zugspitze with respective solar zenith angle (SZA) and the error which represents two times the standard error of the mean ( $\pm 2 \sigma/\sqrt{n}$ ) value for July, August, and September.

| July     |                                |                     | August   |                                |                     | September |                                |                     |
|----------|--------------------------------|---------------------|----------|--------------------------------|---------------------|-----------|--------------------------------|---------------------|
| SZA (°)  | NO <sub>2</sub> partial column | $2 \sigma/\sqrt{n}$ | SZA (°)  | NO <sub>2</sub> partial column | $2 \sigma/\sqrt{n}$ | SZA (°)   | NO <sub>2</sub> partial column | $2 \sigma/\sqrt{n}$ |
| 75.353   | 2.64E+15                       | 5.90E+13            | 74.4798  | 2.42E+15                       | 2.45E+14            | 78.2258   | 2.22E+15                       | 1.07E+14            |
| 73.353   | 2.73E+15                       | 1.56E+14            | 72.4798  | 2.58E+15                       | 1.69E+14            | 76.2258   | 2.24E+15                       | 6.67E+13            |
| 71.353   | 2.68E+15                       | 6.10E+13            | 70.4798  | 2.40E+15                       | 9.45E+13            | 74.2258   | 2.19E+15                       | 7.28E+13            |
| 69.353   | 2.71E+15                       | 6.57E+13            | 68.4798  | 2.47E+15                       | 1.12E+14            | 72.2258   | 2.18E+15                       | 5.63E+13            |
| 67.353   | 2.70E+15                       | 1.11E+14            | 66.4798  | 2.47E+15                       | 1.02E+14            | 70.2258   | 2.23E+15                       | 6.55E+13            |
| 65.353   | 2.75E+15                       | 7.47E+13            | 64.4798  | 2.52E+15                       | 7.09E+13            | 68.2258   | 2.21E+15                       | 4.29E+13            |
| 63.353   | 2.70E+15                       | 5.92E+13            | 62.4798  | 2.54E+15                       | 9.20E+13            | 66.2258   | 2.27E+15                       | 4.52E+13            |
| 61.353   | 2.69E+15                       | 5.23E+13            | 60.4798  | 2.55E+15                       | 5.56E+13            | 64.2258   | 2.27E+15                       | 3.80E+13            |
| 59.353   | 2.75E+15                       | 6.32E+13            | 58.4798  | 2.59E+15                       | 7.41E+13            | 62.2258   | 2.35E+15                       | 4.21E+13            |
| 57.353   | 2.79E+15                       | 4.77E+13            | 56.4798  | 2.67E+15                       | 6.34E+13            | 60.2258   | 2.35E+15                       | 3.64E+13            |
| 55.353   | 2.78E+15                       | 8.02E+13            | 54.4798  | 2.73E+15                       | 5.54E+13            | 58.2258   | 2.39E+15                       | 5.13E+13            |
| 53.353   | 2.83E+15                       | 5.42E+13            | 52.4798  | 2.71E+15                       | 5.97E+13            | 56.2258   | 2.45E+15                       | 5.09E+13            |
| 51.353   | 2.81E+15                       | 6.30E+13            | 50.4798  | 2.68E+15                       | 7.61E+13            | 54.2258   | 2.44E+15                       | 5.45E+13            |
| 49.353   | 2.81E+15                       | 8.71E+13            | 48.4798  | 2.76E+15                       | 5.81E+13            | 52.2258   | 2.50E+15                       | 5.46E+13            |
| 47.353   | 2.92E+15                       | 6.57E+13            | 46.4798  | 2.78E+15                       | 8.75E+13            | 50.2258   | 2.55E+15                       | 4.17E+13            |
| 45.353   | 2.91E+15                       | 8.40E+13            | 44.4798  | 2.87E+15                       | 7.30E+13            | 48.2258   | 2.62E+15                       | 4.78E+13            |
| 43.353   | 2.92E+15                       | 8.27E+13            | 42.4798  | 2.90E+15                       | 6.02E+13            | 46.2258   | 2.69E+15                       | 4.86E+13            |
| 41.353   | 3.02E+15                       | 6.06E+13            | 40.4798  | 2.92E+15                       | 6.44E+13            | -46.9838  | 2.88E+15                       | 6.05E+13            |
| 39.353   | 3.04E+15                       | 7.14E+13            | 38.4798  | 2.94E+15                       | 6.84E+13            | -48.9838  | 2.84E+15                       | 8.94E+13            |
| 37.353   | 2.93E+15                       | 9.24E+13            | 36.4798  | 3.01E+15                       | 5.55E+13            | -50.9838  | 2.77E+15                       | 7.95E+13            |
| 35.353   | 3.09E+15                       | 7.36E+13            | -31.6087 | 3.34E+15                       | 1.71E+14            | -52.9838  | 2.87E+15                       | 8.35E+13            |
| 33.353   | 3.06E+15                       | 6.03E+13            | -33.6087 | 3.19E+15                       | 1.24E+14            | -54.9838  | 2.94E+15                       | 1.11E+14            |
| 31.353   | 3.07E+15                       | 7.62E+13            | -35.6087 | 3.17E+15                       | 1.05E+14            | -56.9838  | 2.99E+15                       | 8.26E+13            |
| 29.353   | 3.19E+15                       | 6.32E+13            | -37.6087 | 3.14E+15                       | 7.76E+13            | -58.9838  | 3.01E+15                       | 9.89E+13            |
| 27.353   | 3.23E+15                       | 6.13E+13            | -39.6087 | 3.16E+15                       | 8.21E+13            | -60.9838  | 3.05E+15                       | 1.21E+14            |
| -24.7082 | 3.34E+15                       | 1.00E+14            | -41.6087 | 3.05E+15                       | 1.13E+14            | -62.9838  | 3.02E+15                       | 1.62E+14            |
| -26.7082 | 3.21E+15                       | 7.82E+13            | -43.6087 | 3.12E+15                       | 1.02E+14            | -64.9838  | 3.13E+15                       | 1.02E+14            |
| -28.7082 | 3.33E+15                       | 1.01E+14            | -45.6087 | 3.26E+15                       | 1.36E+14            | -66.9838  | 3.10E+15                       | 1.23E+14            |
| -30.7082 | 3.32E+15                       | 1.02E+14            | -47.6087 | 3.37E+15                       | 1.44E+14            | -68.9838  | 3.07E+15                       | 1.17E+14            |

|          |          |          |          |          |          |          |          |          |
|----------|----------|----------|----------|----------|----------|----------|----------|----------|
| -32.7082 | 3.23E+15 | 2.11E+14 | -49.6087 | 3.35E+15 | 1.23E+14 | -70.9838 | 3.11E+15 | 1.38E+14 |
| -34.7082 | 3.54E+15 | 1.48E+14 | -51.6087 | 3.25E+15 | 2.29E+14 | -72.9838 | 3.25E+15 | 9.10E+13 |
| -36.7082 | 3.34E+15 | 2.61E+14 | -53.6087 | 3.37E+15 | 1.91E+14 | -74.9838 | 3.16E+15 | 9.14E+13 |
| -38.7082 | 3.37E+15 | 1.14E+14 | -55.6087 | 3.27E+15 | 9.47E+13 | -76.9838 | 3.26E+15 | 1.29E+14 |
| -40.7082 | 3.42E+15 | 1.17E+14 | -57.6087 | 3.13E+15 | 1.71E+14 | -78.9838 | 3.34E+15 | 1.08E+14 |
| -42.7082 | 3.45E+15 | 1.95E+14 | -59.6087 | 3.51E+15 | 9.91E+13 |          |          |          |
| -44.7082 | 3.48E+15 | 1.78E+14 | -61.6087 | 3.23E+15 | 3.32E+14 |          |          |          |
| -46.7082 | 3.50E+15 | 2.98E+14 | -63.6087 | 3.46E+15 | 1.97E+14 |          |          |          |
| -48.7082 | 3.38E+15 | 1.48E+14 | -65.6087 | 3.53E+15 | 1.31E+14 |          |          |          |
| -50.7082 | 3.53E+15 | 1.18E+14 | -67.6087 | 3.40E+15 | 1.83E+14 |          |          |          |
| -52.7082 | 3.62E+15 | 2.93E+14 | -69.6087 | 3.48E+15 | 9.14E+13 |          |          |          |
| -54.7082 | 3.49E+15 | 1.61E+14 | -73.6087 | 3.55E+15 | 1.34E+14 |          |          |          |
| -58.7082 | 3.58E+15 | 1.85E+14 | -75.6087 | 3.54E+15 | 8.04E+13 |          |          |          |
| -60.7082 | 3.46E+15 | 1.29E+14 | -77.6087 | 3.62E+15 | 4.49E+13 |          |          |          |
| -62.7082 | 3.55E+15 | 3.12E+14 |          |          |          |          |          |          |
| -64.7082 | 3.30E+15 | 6.12E+14 |          |          |          |          |          |          |
| -66.7082 | 3.42E+15 | 7.13E+14 |          |          |          |          |          |          |
| -68.7082 | 3.80E+15 | 1.74E+14 |          |          |          |          |          |          |
| -72.7082 | 3.74E+15 | 1.56E+14 |          |          |          |          |          |          |
| -74.7082 | 3.71E+15 | 1.90E+14 |          |          |          |          |          |          |
| -76.7082 | 3.90E+15 | 7.59E+13 |          |          |          |          |          |          |
| -78.7082 | 3.85E+15 | 1.86E+14 |          |          |          |          |          |          |

**Table S12.** NO<sub>2</sub> partial column above 16 km altitude measured at Zugspitze with respective solar zenith angle (SZA) and the error which represents two times the standard error of the mean ( $\pm 2 \sigma/\sqrt{(n)}$ ) value for October, November, and December.

| October  |                                |                       | November |                                |                       | December |                                |                       |
|----------|--------------------------------|-----------------------|----------|--------------------------------|-----------------------|----------|--------------------------------|-----------------------|
| SZA (°)  | NO <sub>2</sub> partial column | $2 \sigma/\sqrt{(n)}$ | SZA (°)  | NO <sub>2</sub> partial column | $2 \sigma/\sqrt{(n)}$ | SZA (°)  | NO <sub>2</sub> partial column | $2 \sigma/\sqrt{(n)}$ |
| 77.8311  | 1.87E+15                       | 3.89E+13              | 80.8135  | 1.42E+15                       | 1.96E+13              | 80.2144  | 1.16E+15                       | 1.45E+14              |
| 75.8311  | 1.88E+15                       | 5.26E+13              | 78.8135  | 1.42E+15                       | 6.35E+13              | 78.2144  | 1.11E+15                       | 5.83E+13              |
| 73.8311  | 1.89E+15                       | 4.48E+13              | 76.8135  | 1.41E+15                       | 5.22E+13              | 76.2144  | 1.16E+15                       | 5.43E+13              |
| 71.8311  | 1.90E+15                       | 3.83E+13              | 74.8135  | 1.43E+15                       | 4.81E+13              | 74.2144  | 1.18E+15                       | 4.43E+13              |
| 69.8311  | 1.91E+15                       | 3.57E+13              | 72.8135  | 1.43E+15                       | 4.29E+13              | 72.2144  | 1.23E+15                       | 3.72E+13              |
| 67.8311  | 1.92E+15                       | 5.48E+13              | 70.8135  | 1.45E+15                       | 3.71E+13              | -72.9706 | 1.39E+15                       | 4.19E+13              |
| 65.8311  | 1.94E+15                       | 4.07E+13              | 68.8135  | 1.51E+15                       | 2.87E+13              | -74.9706 | 1.42E+15                       | 5.09E+13              |
| 63.8311  | 1.98E+15                       | 3.78E+13              | -68.9998 | 1.67E+15                       | 3.95E+13              | -76.9706 | 1.50E+15                       | 5.51E+13              |
| 61.8311  | 1.99E+15                       | 3.67E+13              | -70.9998 | 1.77E+15                       | 5.06E+13              | -78.9706 | 1.51E+15                       | 6.19E+13              |
| 59.8311  | 2.07E+15                       | 2.89E+13              | -72.9998 | 1.74E+15                       | 5.33E+13              |          |                                |                       |
| 57.8311  | 2.17E+15                       | 3.43E+13              | -74.9998 | 1.82E+15                       | 6.34E+13              |          |                                |                       |
| -58.9918 | 2.32E+15                       | 4.85E+13              | -76.9998 | 1.87E+15                       | 6.18E+13              |          |                                |                       |
| -60.9918 | 2.24E+15                       | 4.93E+13              | -78.9998 | 1.91E+15                       | 7.36E+13              |          |                                |                       |
| -62.9918 | 2.31E+15                       | 6.30E+13              |          |                                |                       |          |                                |                       |
| -64.9918 | 2.37E+15                       | 6.98E+13              |          |                                |                       |          |                                |                       |
| -66.9918 | 2.38E+15                       | 6.26E+13              |          |                                |                       |          |                                |                       |
| -68.9918 | 2.43E+15                       | 7.16E+13              |          |                                |                       |          |                                |                       |
| -70.9918 | 2.48E+15                       | 6.71E+13              |          |                                |                       |          |                                |                       |
| -72.9918 | 2.51E+15                       | 6.80E+13              |          |                                |                       |          |                                |                       |
| -74.9918 | 2.57E+15                       | 7.62E+13              |          |                                |                       |          |                                |                       |
| -76.9918 | 2.54E+15                       | 8.35E+13              |          |                                |                       |          |                                |                       |
| -78.9918 | 2.63E+15                       | 8.76E+13              |          |                                |                       |          |                                |                       |

45 **Table S13.** NO partial column above 16 km altitude measured at Zugspitze with respective solar zenith angle (SZA) and the error which represents two times the standard error of the mean ( $\pm 2 \sigma/\sqrt{(n)}$ ) value for January, February, and March.

| SZA (°)  | January<br>NO partial<br>column | $2 \sigma/\sqrt{(n)}$ | SZA (°) | February<br>NO partial<br>column | $2 \sigma/\sqrt{(n)}$ | SZA (°) | March<br>NO partial<br>column | $2 \sigma/\sqrt{(n)}$ |
|----------|---------------------------------|-----------------------|---------|----------------------------------|-----------------------|---------|-------------------------------|-----------------------|
| 79.8474  | 2.38E+15                        | 1.66E+14              | 78.291  | 2.53E+15                         | 1.36E+14              | 80.1374 | 2.39E+15                      | 1.83E+14              |
| 77.8474  | 2.20E+15                        | 1.29E+14              | 76.291  | 2.39E+15                         | 1.64E+14              | 78.1374 | 2.49E+15                      | 1.32E+14              |
| 75.8474  | 2.29E+15                        | 1.06E+14              | 74.291  | 2.40E+15                         | 1.97E+14              | 76.1374 | 2.79E+15                      | 2.41E+14              |
| 73.8474  | 2.34E+15                        | 1.24E+14              | 72.291  | 2.47E+15                         | 1.64E+14              | 74.1374 | 2.71E+15                      | 2.43E+14              |
| 71.8474  | 2.48E+15                        | 1.43E+14              | 70.291  | 2.57E+15                         | 1.31E+14              | 72.1374 | 2.63E+15                      | 1.78E+14              |
| 69.8474  | 2.46E+15                        | 7.72E+13              | 68.291  | 2.56E+15                         | 1.60E+14              | 70.1374 | 2.55E+15                      | 1.67E+14              |
| 67.8474  | 2.59E+15                        | 1.08E+14              | 66.291  | 2.66E+15                         | 9.77E+13              | 68.1374 | 2.67E+15                      | 1.56E+14              |
| -68.8348 | 2.74E+15                        | 1.10E+14              | 64.291  | 2.64E+15                         | 8.82E+13              | 66.1374 | 2.73E+15                      | 1.93E+14              |
| -70.8348 | 2.75E+15                        | 1.20E+14              | 62.291  | 2.75E+15                         | 1.18E+14              | 64.1374 | 2.84E+15                      | 1.52E+14              |
| -72.8348 | 2.75E+15                        | 1.07E+14              | 60.291  | 2.80E+15                         | 1.44E+14              | 62.1374 | 2.72E+15                      | 1.40E+14              |
| -74.8348 | 2.69E+15                        | 1.26E+14              | -60.707 | 2.89E+15                         | 1.69E+14              | 60.1374 | 2.91E+15                      | 1.54E+14              |
| -76.8348 | 2.81E+15                        | 1.45E+14              | -62.707 | 2.95E+15                         | 9.26E+13              | 58.1374 | 2.84E+15                      | 1.41E+14              |
| -78.8348 | 2.67E+15                        | 2.19E+14              | -64.707 | 2.80E+15                         | 1.10E+14              | 56.1374 | 2.91E+15                      | 1.34E+14              |
|          |                                 |                       | -66.707 | 2.92E+15                         | 1.40E+14              | 54.1374 | 2.95E+15                      | 1.54E+14              |
|          |                                 |                       | -68.707 | 3.00E+15                         | 1.91E+14              | 52.1374 | 2.93E+15                      | 1.39E+14              |
|          |                                 |                       | -70.707 | 3.05E+15                         | 8.79E+13              | 50.1374 | 3.21E+15                      | 1.22E+14              |
|          |                                 |                       | -72.707 | 2.95E+15                         | 1.28E+14              | -50.813 | 3.43E+15                      | 1.30E+14              |
|          |                                 |                       | -74.707 | 3.05E+15                         | 1.80E+14              | -52.813 | 3.24E+15                      | 1.78E+14              |
|          |                                 |                       | -76.707 | 2.97E+15                         | 1.39E+14              | -54.813 | 3.20E+15                      | 1.25E+14              |
|          |                                 |                       | -78.707 | 2.71E+15                         | 1.64E+14              | -56.813 | 3.39E+15                      | 1.36E+14              |
|          |                                 |                       |         |                                  |                       | -58.813 | 3.16E+15                      | 1.76E+14              |
|          |                                 |                       |         |                                  |                       | -60.813 | 3.39E+15                      | 3.14E+14              |
|          |                                 |                       |         |                                  |                       | -62.813 | 3.46E+15                      | 1.81E+14              |
|          |                                 |                       |         |                                  |                       | -64.813 | 3.37E+15                      | 1.36E+14              |
|          |                                 |                       |         |                                  |                       | -66.813 | 3.21E+15                      | 1.12E+14              |
|          |                                 |                       |         |                                  |                       | -68.813 | 3.09E+15                      | 2.80E+14              |
|          |                                 |                       |         |                                  |                       | -70.813 | 3.35E+15                      | 1.40E+14              |
|          |                                 |                       |         |                                  |                       | -72.813 | 3.19E+15                      | 2.58E+14              |
|          |                                 |                       |         |                                  |                       | -74.813 | 3.27E+15                      | 1.49E+14              |
|          |                                 |                       |         |                                  |                       | -76.813 | 3.21E+15                      | 1.68E+14              |
|          |                                 |                       |         |                                  |                       | -78.813 | 3.38E+15                      | 3.19E+14              |

**Table S14.** NO partial column above 16 km altitude measured at Zugspitze with respective solar zenith angle (SZA) and the error which represents two times the standard error of the mean ( $\pm 2 \sigma/\sqrt{(n)}$ ) value for April, May, and June.

| SZA (°) | April<br>NO partial<br>column | $2 \sigma/\sqrt{(n)}$ | SZA (°) | May<br>NO partial<br>column | $2 \sigma/\sqrt{(n)}$ | SZA (°) | June<br>NO partial<br>column | $2 \sigma/\sqrt{(n)}$ |
|---------|-------------------------------|-----------------------|---------|-----------------------------|-----------------------|---------|------------------------------|-----------------------|
| 76.5948 | 2.62E+15                      | 4.50E+13              | 70.6782 | 2.94E+15                    | 6.68E+13              | 71.0447 | 2.89E+15                     | 8.77E+13              |
| 74.5948 | 2.67E+15                      | 2.20E+14              | 68.6782 | 2.94E+15                    | 7.78E+13              | 69.0447 | 3.52E+15                     | 4.80E+14              |
| 72.5948 | 2.66E+15                      | 2.27E+14              | 66.6782 | 2.98E+15                    | 1.20E+14              | 67.0447 | 3.06E+15                     | 1.67E+14              |
| 70.5948 | 2.79E+15                      | 1.51E+14              | 64.6782 | 2.97E+15                    | 1.70E+14              | 65.0447 | 3.20E+15                     | 1.17E+14              |
| 68.5948 | 2.69E+15                      | 1.76E+14              | 62.6782 | 3.15E+15                    | 9.87E+13              | 63.0447 | 3.12E+15                     | 2.33E+14              |
| 66.5948 | 2.71E+15                      | 1.01E+14              | 60.6782 | 2.91E+15                    | 2.00E+14              | 61.0447 | 3.12E+15                     | 1.13E+14              |
| 64.5948 | 3.00E+15                      | 2.65E+14              | 58.6782 | 3.13E+15                    | 1.04E+14              | 59.0447 | 3.20E+15                     | 1.26E+14              |
| 62.5948 | 2.86E+15                      | 9.87E+13              | 56.6782 | 3.06E+15                    | 1.16E+14              | 57.0447 | 3.22E+15                     | 1.11E+14              |
| 60.5948 | 2.95E+15                      | 1.58E+14              | 52.6782 | 3.31E+15                    | 2.28E+14              | 55.0447 | 3.11E+15                     | 1.93E+14              |
| 58.5948 | 2.98E+15                      | 1.34E+14              | 50.6782 | 3.24E+15                    | 1.59E+14              | 53.0447 | 3.24E+15                     | 1.31E+14              |
| 56.5948 | 2.90E+15                      | 1.04E+14              | 48.6782 | 3.26E+15                    | 1.22E+14              | 51.0447 | 3.39E+15                     | 1.32E+14              |

|          |          |          |          |          |          |          |          |          |
|----------|----------|----------|----------|----------|----------|----------|----------|----------|
| 54.5948  | 3.14E+15 | 1.71E+14 | 46.6782  | 3.35E+15 | 9.61E+13 | 49.0447  | 3.27E+15 | 1.17E+14 |
| 52.5948  | 3.00E+15 | 1.66E+14 | 44.6782  | 3.39E+15 | 1.38E+14 | 47.0447  | 3.41E+15 | 1.47E+14 |
| 50.5948  | 2.93E+15 | 1.05E+14 | 42.6782  | 3.49E+15 | 1.50E+14 | 45.0447  | 3.45E+15 | 1.50E+14 |
| 48.5948  | 3.16E+15 | 1.62E+14 | 40.6782  | 3.43E+15 | 1.24E+14 | 43.0447  | 3.43E+15 | 2.12E+14 |
| 46.5948  | 3.17E+15 | 1.10E+14 | 38.6782  | 3.35E+15 | 2.01E+14 | 41.0447  | 3.40E+15 | 2.81E+14 |
| 44.5948  | 3.29E+15 | 9.20E+13 | 36.6782  | 3.51E+15 | 1.73E+14 | 39.0447  | 3.39E+15 | 1.29E+14 |
| 42.5948  | 3.20E+15 | 1.07E+14 | 34.6782  | 3.46E+15 | 1.70E+14 | 37.0447  | 3.48E+15 | 1.24E+14 |
| 40.5948  | 3.34E+15 | 1.28E+14 | 32.6782  | 3.55E+15 | 1.67E+14 | 35.0447  | 3.72E+15 | 2.14E+14 |
| 38.5948  | 3.44E+15 | 1.83E+14 | 30.6782  | 3.83E+15 | 2.24E+14 | 33.0447  | 3.79E+15 | 1.17E+14 |
| -38.9087 | 3.51E+15 | 1.07E+14 | -31.2945 | 3.75E+15 | 1.63E+14 | 31.0447  | 3.55E+15 | 1.15E+14 |
| -40.9087 | 3.42E+15 | 1.14E+14 | -33.2945 | 3.62E+15 | 1.09E+14 | 29.0447  | 3.68E+15 | 1.45E+14 |
| -42.9087 | 3.57E+15 | 1.37E+14 | -35.2945 | 3.76E+15 | 2.53E+14 | 27.0447  | 3.60E+15 | 1.55E+14 |
| -44.9087 | 3.40E+15 | 2.21E+14 | -37.2945 | 3.76E+15 | 2.86E+14 | 25.0447  | 3.77E+15 | 1.34E+14 |
| -46.9087 | 3.60E+15 | 2.18E+14 | -39.2945 | 3.95E+15 | 4.82E+14 | -27.4853 | 3.85E+15 | 1.81E+14 |
| -48.9087 | 3.73E+15 | 2.54E+14 | -41.2945 | 3.64E+15 | 1.86E+14 | -29.4853 | 3.77E+15 | 1.33E+14 |
| -50.9087 | 3.51E+15 | 1.07E+14 | -43.2945 | 3.77E+15 | 3.97E+14 | -31.4853 | 4.06E+15 | 1.55E+14 |
| -52.9087 | 3.34E+15 | 5.91E+13 | -47.2945 | 3.61E+15 | 2.07E+13 | -33.4853 | 4.23E+15 | 3.21E+14 |
| -54.9087 | 3.57E+15 | 2.73E+14 | -49.2945 | 3.69E+15 | 3.04E+14 | -35.4853 | 4.19E+15 | 2.12E+14 |
| -56.9087 | 3.51E+15 | 2.84E+14 | -51.2945 | 3.87E+15 | 1.64E+14 | -37.4853 | 3.96E+15 | 2.96E+14 |
| -58.9087 | 3.34E+15 | 1.30E+14 | -61.2945 | 3.60E+15 | 1.21E+14 | -39.4853 | 3.94E+15 | 6.84E+14 |
| -60.9087 | 3.43E+15 | 2.12E+14 | -69.2945 | 3.75E+15 | 2.67E+14 | -41.4853 | 4.06E+15 | 1.35E+14 |
| -62.9087 | 3.91E+15 | 1.44E+14 | -75.2945 | 3.68E+15 | 3.40E+14 | -43.4853 | 3.54E+15 | 2.47E+14 |
| -64.9087 | 3.52E+15 | 2.34E+14 |          |          |          | -45.4853 | 3.89E+15 | 2.53E+14 |
| -66.9087 | 3.48E+15 | 2.67E+14 |          |          |          | -47.4853 | 4.26E+15 | 2.83E+13 |
| -68.9087 | 3.61E+15 | 3.90E+14 |          |          |          | -55.4853 | 3.41E+15 | 2.91E+14 |
| -70.9087 | 3.50E+15 | 2.69E+14 |          |          |          | -57.4853 | 4.07E+15 | 1.60E+14 |
| -72.9087 | 3.44E+15 | 3.64E+14 |          |          |          | -59.4853 | 4.09E+15 | 3.72E+14 |
| -74.9087 | 3.19E+15 | 9.97E+13 |          |          |          | -61.4853 | 4.05E+15 | 2.58E+14 |
| -76.9087 | 3.42E+15 | 4.54E+14 |          |          |          | -63.4853 | 3.77E+15 | 8.58E+14 |
| -78.9087 | 3.29E+15 | 1.62E+14 |          |          |          | -65.4853 | 3.89E+15 | 3.37E+14 |
|          |          |          |          |          |          | -67.4853 | 4.24E+15 | 1.01E+14 |
|          |          |          |          |          |          | -69.4853 | 3.58E+15 | 3.27E+14 |
|          |          |          |          |          |          | -71.4853 | 3.72E+15 | 3.35E+14 |
|          |          |          |          |          |          | -75.4853 | 3.59E+15 | 6.47E+14 |

50

**Table S15.** NO partial column above 16 km altitude measured at Zugspitze with respective solar zenith angle (SZA) and the error which represents two times the standard error of the mean ( $\pm 2 \sigma/\sqrt{(n)}$ ) value for July, August, and September.

| SZA (°) | July<br>NO partial<br>column | $2 \sigma/\sqrt{(n)}$ | SZA (°) | August<br>NO partial<br>column | $2 \sigma/\sqrt{(n)}$ | SZA (°) | September<br>NO partial<br>column | $2 \sigma/\sqrt{(n)}$ |
|---------|------------------------------|-----------------------|---------|--------------------------------|-----------------------|---------|-----------------------------------|-----------------------|
| 73.3811 | 2.93E+15                     | 4.91E+14              | 70.9262 | 3.16E+15                       | 1.78E+14              | 76.1915 | 3.11E+15                          | 1.67E+14              |
| 71.3811 | 3.35E+15                     | 4.07E+14              | 68.9262 | 2.98E+15                       | 1.06E+14              | 74.1915 | 3.12E+15                          | 2.05E+14              |
| 69.3811 | 3.12E+15                     | 1.81E+14              | 66.9262 | 3.21E+15                       | 1.41E+14              | 72.1915 | 2.98E+15                          | 1.09E+14              |
| 67.3811 | 3.20E+15                     | 2.00E+14              | 64.9262 | 3.28E+15                       | 2.36E+14              | 70.1915 | 3.05E+15                          | 1.26E+14              |
| 65.3811 | 3.24E+15                     | 1.84E+14              | 62.9262 | 3.22E+15                       | 1.98E+14              | 68.1915 | 3.19E+15                          | 1.26E+14              |
| 63.3811 | 3.13E+15                     | 1.10E+14              | 60.9262 | 3.37E+15                       | 3.65E+14              | 66.1915 | 3.12E+15                          | 1.25E+14              |
| 61.3811 | 3.27E+15                     | 2.34E+14              | 58.9262 | 3.31E+15                       | 1.48E+14              | 64.1915 | 3.19E+15                          | 2.29E+14              |
| 59.3811 | 3.30E+15                     | 1.40E+14              | 56.9262 | 3.28E+15                       | 1.45E+14              | 62.1915 | 3.23E+15                          | 1.71E+14              |
| 57.3811 | 3.28E+15                     | 1.52E+14              | 54.9262 | 3.47E+15                       | 9.71E+13              | 60.1915 | 3.37E+15                          | 1.35E+14              |
| 55.3811 | 3.37E+15                     | 8.91E+13              | 52.9262 | 3.42E+15                       | 1.54E+14              | 58.1915 | 3.38E+15                          | 1.56E+14              |
| 53.3811 | 3.27E+15                     | 1.44E+14              | 50.9262 | 3.29E+15                       | 1.48E+14              | 56.1915 | 3.47E+15                          | 1.56E+14              |
| 51.3811 | 3.35E+15                     | 1.16E+14              | 48.9262 | 3.49E+15                       | 2.06E+14              | 54.1915 | 3.56E+15                          | 1.62E+14              |
| 49.3811 | 3.44E+15                     | 1.50E+14              | 46.9262 | 3.66E+15                       | 2.36E+14              | 52.1915 | 3.68E+15                          | 1.29E+14              |
| 47.3811 | 3.50E+15                     | 1.44E+14              | 44.9262 | 3.64E+15                       | 2.22E+14              | 50.1915 | 3.60E+15                          | 1.17E+14              |

|          |          |          |          |          |          |          |          |          |
|----------|----------|----------|----------|----------|----------|----------|----------|----------|
| 45.3811  | 3.48E+15 | 1.06E+14 | 42.9262  | 3.58E+15 | 1.16E+14 | 48.1915  | 3.65E+15 | 1.65E+14 |
| 43.3811  | 3.76E+15 | 3.10E+14 | 40.9262  | 3.66E+15 | 1.30E+14 | 46.1915  | 3.78E+15 | 1.49E+14 |
| 41.3811  | 3.48E+15 | 1.39E+14 | 38.9262  | 3.85E+15 | 1.55E+14 | -46.7815 | 3.93E+15 | 1.33E+14 |
| 39.3811  | 3.63E+15 | 2.60E+14 | 36.9262  | 3.75E+15 | 1.11E+14 | -48.7815 | 3.94E+15 | 1.36E+14 |
| 37.3811  | 3.78E+15 | 2.33E+14 | -37.7221 | 3.87E+15 | 7.25E+14 | -50.7815 | 3.80E+15 | 1.45E+14 |
| 35.3811  | 3.68E+15 | 1.85E+14 | -39.7221 | 3.98E+15 | 3.95E+14 | -52.7815 | 4.04E+15 | 1.70E+14 |
| 33.3811  | 3.82E+15 | 1.45E+14 | -41.7221 | 4.16E+15 | 1.54E+14 | -54.7815 | 4.04E+15 | 1.68E+14 |
| 31.3811  | 3.82E+15 | 2.16E+14 | -43.7221 | 4.00E+15 | 2.21E+14 | -56.7815 | 3.98E+15 | 1.98E+14 |
| 29.3811  | 3.66E+15 | 1.12E+14 | -45.7221 | 3.92E+15 | 2.52E+14 | -58.7815 | 4.04E+15 | 2.46E+14 |
| -24.8772 | 3.83E+15 | 4.21E+14 | -47.7221 | 4.01E+15 | 1.89E+14 | -60.7815 | 4.00E+15 | 1.91E+14 |
| -26.8772 | 3.86E+15 | 2.30E+14 | -49.7221 | 4.24E+15 | 2.62E+14 | -62.7815 | 3.73E+15 | 1.32E+14 |
| -28.8772 | 3.97E+15 | 2.50E+14 | -51.7221 | 4.27E+15 | 3.39E+14 | -64.7815 | 4.21E+15 | 2.27E+14 |
| -30.8772 | 4.13E+15 | 2.66E+14 | -55.7221 | 3.89E+15 | 2.51E+14 | -66.7815 | 3.95E+15 | 2.07E+14 |
| -32.8772 | 4.10E+15 | 2.63E+14 | -57.7221 | 3.97E+15 | 3.42E+14 | -68.7815 | 4.00E+15 | 3.45E+14 |
| -36.8772 | 4.22E+15 | 2.40E+14 | -59.7221 | 3.96E+15 | 4.88E+14 | -70.7815 | 3.66E+15 | 2.44E+14 |
| -38.8772 | 3.43E+15 | 2.63E+14 | -61.7221 | 4.09E+15 | 3.66E+14 | -72.7815 | 3.96E+15 | 1.52E+14 |
| -40.8772 | 3.93E+15 | 2.36E+14 | -63.7221 | 3.97E+15 | 2.98E+13 | -74.7815 | 4.02E+15 | 2.51E+14 |
| -42.8772 | 4.21E+15 | 2.41E+14 | -67.7221 | 4.03E+15 | 3.79E+14 | -76.7815 | 3.99E+15 | 3.20E+14 |
| -44.8772 | 3.69E+15 | 9.31E+13 | -69.7221 | 3.77E+15 | 3.22E+12 | -78.7815 | 3.97E+15 | 2.64E+14 |
| -48.8772 | 3.88E+15 | 2.80E+14 |          |          |          |          |          |          |
| -50.8772 | 4.09E+15 | 4.90E+14 |          |          |          |          |          |          |
| -56.8772 | 3.80E+15 | 6.67E+14 |          |          |          |          |          |          |
| -60.8772 | 3.62E+15 | 1.70E+14 |          |          |          |          |          |          |
| -62.8772 | 3.71E+15 | 2.63E+14 |          |          |          |          |          |          |
| -64.8772 | 3.78E+15 | 2.80E+13 |          |          |          |          |          |          |
| -66.8772 | 3.94E+15 | 3.54E+14 |          |          |          |          |          |          |
| -68.8772 | 3.73E+15 | 5.27E+14 |          |          |          |          |          |          |
| -72.8772 | 3.97E+15 | 4.53E+14 |          |          |          |          |          |          |

55 **Table S16.** NO partial column above 16 km altitude measured at Zugspitze with respective solar zenith angle (SZA) and the error which represents two times the standard error of the mean ( $\pm 2 \sigma/\sqrt{(n)}$ ) value for October, November, and December.

| SZA (°)  | October<br>NO partial<br>column | $2 \sigma/\sqrt{(n)}$ | SZA (°)  | November<br>NO partial<br>column | $2 \sigma/\sqrt{(n)}$ | SZA (°)  | December<br>NO partial<br>column | $2 \sigma/\sqrt{(n)}$ |
|----------|---------------------------------|-----------------------|----------|----------------------------------|-----------------------|----------|----------------------------------|-----------------------|
| 80.0769  | 2.98E+15                        | 2.31E+14              | 79.398   | 2.59E+15                         | 1.50E+14              | 80.3428  | 2.43E+15                         | 1.80E+14              |
| 78.0769  | 2.83E+15                        | 1.08E+14              | 77.398   | 2.70E+15                         | 1.37E+14              | 78.3428  | 2.41E+15                         | 1.42E+14              |
| 76.0769  | 3.01E+15                        | 9.37E+13              | 75.398   | 2.76E+15                         | 1.15E+14              | 76.3428  | 2.37E+15                         | 1.65E+14              |
| 74.0769  | 2.99E+15                        | 1.40E+14              | 73.398   | 2.64E+15                         | 1.06E+14              | 74.3428  | 2.43E+15                         | 8.55E+13              |
| 72.0769  | 3.00E+15                        | 1.79E+14              | 71.398   | 2.84E+15                         | 1.32E+14              | 72.3428  | 2.45E+15                         | 1.11E+14              |
| 70.0769  | 3.02E+15                        | 1.42E+14              | 69.398   | 2.84E+15                         | 9.15E+13              | -70.9104 | 2.69E+15                         | 8.94E+13              |
| 68.0769  | 3.08E+15                        | 1.54E+14              | -68.9276 | 3.10E+15                         | 9.97E+13              | -72.9104 | 2.79E+15                         | 1.22E+14              |
| 66.0769  | 3.26E+15                        | 1.29E+14              | -70.9276 | 3.15E+15                         | 1.15E+14              | -74.9104 | 2.72E+15                         | 1.12E+14              |
| 64.0769  | 3.28E+15                        | 1.07E+14              | -72.9276 | 3.19E+15                         | 1.01E+14              | -76.9104 | 2.85E+15                         | 2.59E+14              |
| 62.0769  | 3.27E+15                        | 1.00E+14              | -74.9276 | 3.21E+15                         | 1.29E+14              | -78.9104 | 2.73E+15                         | 1.73E+14              |
| 60.0769  | 3.42E+15                        | 1.37E+14              | -76.9276 | 3.13E+15                         | 1.81E+14              |          |                                  |                       |
| 58.0769  | 3.47E+15                        | 1.59E+14              | -78.9276 | 3.11E+15                         | 1.60E+14              |          |                                  |                       |
| -58.7488 | 3.78E+15                        | 1.20E+14              |          |                                  |                       |          |                                  |                       |
| -60.7488 | 3.65E+15                        | 1.16E+14              |          |                                  |                       |          |                                  |                       |
| -62.7488 | 3.49E+15                        | 1.03E+14              |          |                                  |                       |          |                                  |                       |
| -64.7488 | 3.71E+15                        | 1.27E+14              |          |                                  |                       |          |                                  |                       |
| -66.7488 | 3.65E+15                        | 2.29E+14              |          |                                  |                       |          |                                  |                       |
| -68.7488 | 3.61E+15                        | 1.18E+14              |          |                                  |                       |          |                                  |                       |
| -70.7488 | 3.75E+15                        | 1.25E+14              |          |                                  |                       |          |                                  |                       |
| -72.7488 | 3.59E+15                        | 1.30E+14              |          |                                  |                       |          |                                  |                       |



|          |          |          |
|----------|----------|----------|
| -74.7488 | 3.63E+15 | 1.26E+14 |
| -76.7488 | 3.59E+15 | 1.29E+14 |
| -78.7488 | 3.70E+15 | 1.96E+14 |
